# Supplementary material for: Post-traumatic stress disorders in women victims-survivors of intimate partner violence: a mixed-methods pilot study in a French coordinated structure
Source: PubMed Central journal article supplement — BMJ Open. 2024 Jan 23;14(1):e075552. doi: 10.1136/bmjopen-2023-075552 (PMC10824011; doi:10.1136/bmjopen-2023-075552), 2024-01-23
Supplement: bmjopen-2023-075552.draft_revisions.pdf [file bmjopen-2023-075552.draft_revisions.pdf]

# BMJ Open

BMJ Open is committed to open peer review. As part of this commitment we make the peer review history of every article we publish publicly available.

When an article is published we post the peer reviewers' comments and the authors' responses online. We also post the versions of the paper that were used during peer review. These are the versions that the peer review comments apply to.

The versions of the paper that follow are the versions that were submitted during the peer review process. They are not the versions of record or the final published versions. They should not be cited or distributed as the published version of this manuscript.

BMJ Open is an open access journal and the full, final, typeset and author-corrected version of record of the manuscript is available on our site with no access controls, subscription charges or pay-per-view fees (<http://bmjopen.bmj.com>).

If you have any questions on BMJ Open's open peer review process please email [info.bmjopen@bmj.com](mailto:info.bmjopen@bmj.com)

# BMJ Open

## Post-traumatic stress disorders in women victims-survivors of violence: a mixed-methods pilot study in a French coordinated structure

|                               |                                                                                                                                                                                                                                                                                                                                                                                                                                                                                                                                                                                                      |
|-------------------------------|------------------------------------------------------------------------------------------------------------------------------------------------------------------------------------------------------------------------------------------------------------------------------------------------------------------------------------------------------------------------------------------------------------------------------------------------------------------------------------------------------------------------------------------------------------------------------------------------------|
| Journal:                      | <i>BMJ Open</i>                                                                                                                                                                                                                                                                                                                                                                                                                                                                                                                                                                                      |
| Manuscript ID                 | bmjopen-2023-075552                                                                                                                                                                                                                                                                                                                                                                                                                                                                                                                                                                                  |
| Article Type:                 | Original research                                                                                                                                                                                                                                                                                                                                                                                                                                                                                                                                                                                    |
| Date Submitted by the Author: | 11-May-2023                                                                                                                                                                                                                                                                                                                                                                                                                                                                                                                                                                                          |
| Complete List of Authors:     | ROLAND, NOEMIE; Centre Hospitalier de Saint-Denis Hôpital Delafontaine, Maison des Femmes<br>Delmas, Noëlla; iPLESP<br>El Khoury, Fabienne; iPLESP<br>Bardou, Alice; Centre Hospitalier de Saint-Denis Hôpital Delafontaine<br>Yacini, Leila; Centre de Santé Municipal "Les Moulins"<br>Feldmann, Laure; Centre de Santé Municipal "Dr Pesqué"<br>Hatem, Ghada; Centre Hospitalier de Saint Denis, Département de Gynécologie et d'Obstétrique<br>Mahdjoub, Sarah; iPLESP<br>Bardou, Marc; Université de Bourgogne, CIC 1432 (Center for Clinical Investigation; Université Bourgogne Franche-Comté |
| Keywords:                     | MENTAL HEALTH, GYNAECOLOGY, EPIDEMIOLOGY                                                                                                                                                                                                                                                                                                                                                                                                                                                                                                                                                             |
|                               |                                                                                                                                                                                                                                                                                                                                                                                                                                                                                                                                                                                                      |

SCHOLARONE™  
Manuscripts

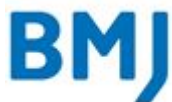

I, the Submitting Author has the right to grant and does grant on behalf of all authors of the Work (as defined in the below author licence), an exclusive licence and/or a non-exclusive licence for contributions from authors who are: i) UK Crown employees; ii) where BMJ has agreed a CC-BY licence shall apply, and/or iii) in accordance with the terms applicable for US Federal Government officers or employees acting as part of their official duties; on a worldwide, perpetual, irrevocable, royalty-free basis to BMJ Publishing Group Ltd ("BMJ") its licensees and where the relevant Journal is co-owned by BMJ to the co-owners of the Journal, to publish the Work in this journal and any other BMJ products and to exploit all rights, as set out in our [licence](#).

The Submitting Author accepts and understands that any supply made under these terms is made by BMJ to the Submitting Author unless you are acting as an employee on behalf of your employer or a postgraduate student of an affiliated institution which is paying any applicable article publishing charge ("APC") for Open Access articles. Where the Submitting Author wishes to make the Work available on an Open Access basis (and intends to pay the relevant APC), the terms of reuse of such Open Access shall be governed by a Creative Commons licence – details of these licences and which [Creative Commons](#) licence will apply to this Work are set out in our licence referred to above.

Other than as permitted in any relevant BMJ Author's Self Archiving Policies, I confirm this Work has not been accepted for publication elsewhere, is not being considered for publication elsewhere and does not duplicate material already published. I confirm all authors consent to publication of this Work and authorise the granting of this licence.

1  
2  
3 Post-traumatic stress disorders in women victims-survivors of violence: a mixed-  
4 methods pilot study in a French coordinated structure  
5  
6  
7  
8  
9

10 Noémie Roland<sup>a\*</sup>(MD, PhD), Noëlla Delmas<sup>b\*</sup>(MPH), Fabienne El-Khoury<sup>b</sup> (PhD), Alice  
11 Bardou<sup>a</sup>, Leila Yacini<sup>c</sup> (MD), Laure Feldmann<sup>d</sup> (MD), Ghada Hatem<sup>a,e</sup> (MD), Sarah Mahdjoub<sup>b</sup>  
12 (PhD), Marc Bardou<sup>f,g</sup> (MD, PhD)  
13  
14  
15  
16  
17

18 **Affiliations:**

19 <sup>a</sup>La Maison des femmes, 1 Chemin du Moulin Basset, 93200 Saint-Denis, France. ++33 1 55 87  
20 42 32 [noemie.roland@assurance-maladie.fr](mailto:noemie.roland@assurance-maladie.fr)  
21  
22

23 <sup>b</sup>Sorbonne Université, INSERM, Institut Pierre Louis d'Epidémiologie et de Santé  
24 Publique, IPLESP, équipe de recherche en épidémiologie sociale, F75012 Paris, France.  
25

26 <sup>c</sup> Centre de Santé Municipal “Les Moulins”, 24 rue du Auguste Poullain 93200 Saint-Denis,  
27 France.  
28

29 <sup>d</sup> Centre de Santé Municipal “Docteur Pesqué”, 5 rue du Dr Pesqué 93300 Aubervilliers, France.  
30

31 <sup>e</sup> Service de gynécologie et obstétrique, Centre Hospitalier de Saint Denis. 2 Rue du Dr  
32 Delafontaine, 93200 Saint-Denis, France.  
33

34 <sup>f</sup> CIC 1432 (Center for Clinical Investigation), CHU Dijon Bourgogne, 14 rue Gaffarel, 21000  
35 Dijon, France  
36

37 <sup>g</sup> Université Bourgogne Franche Comté, UFR des Sciences Santé, 7, bd Jeanne d’Arc, 21000  
38 Dijon, France  
39

40 *Emails*

41 Noémie Roland [noemie.roland@assurance-maladie.fr](mailto:noemie.roland@assurance-maladie.fr)

42 Noëlla Delmas [noella.delmas@gmail.com](mailto:noella.delmas@gmail.com)

43 Fabienne El Khoury [fabienne.khoury@inserm.fr](mailto:fabienne.khoury@inserm.fr)

44 Alice Bardou [alice-bardou@live.com](mailto:alice-bardou@live.com)

45 Leila Yacini [leila.yacini@gmail.com](mailto:leila.yacini@gmail.com)

46 Laure Feldmann [laure.feldmann@yahoo.fr](mailto:laure.feldmann@yahoo.fr)

47 Ghada Hatem [ghada.hatem@ch-stdenis.fr](mailto:ghada.hatem@ch-stdenis.fr)

48 Sarah Mahdjoub [sarah.mahdjoub@inserm.fr](mailto:sarah.mahdjoub@inserm.fr)

49 Marc Bardou [marc.bardou@u-bourgogne.fr](mailto:marc.bardou@u-bourgogne.fr)  
50  
51  
52

53  
54 \*Noémie Roland and Noëlla Delmas contributed equally to this article  
55  
56  
57  
58  
59  
60

1  
2  
3  
4  
5  
6  
7  
8  
9  
10  
11  
12  
13  
14  
15  
16  
17  
18  
19  
20  
21  
22  
23  
24  
25  
26  
27  
28  
29  
30  
31  
32  
33  
34  
35  
36  
37  
38  
39  
40  
41  
42  
43  
44  
45  
46  
47  
48  
49  
50  
51  
52  
53  
54  
55  
56  
57  
58  
59  
60

✉ **Correspondence** to Noemie Roland, La Maison des femmes, 1 Chemin du Moulin Basset, 93200 Saint-Denis, France; E-mail: [noemie.roland@assurance-maladie.fr](mailto:noemie.roland@assurance-maladie.fr)

## ACKNOWLEDGEMENTS

We thank the women who agreed to participate in the study and the staff who ran the interviews with the women.

For peer review only

1  
2  
3 Post-traumatic stress disorders in women victims-survivors of violence: a pilot  
4 study in a French coordinated structure  
5  
6  
7

8  
9 1 **ABSTRACT**

10 2 **Objectives:** To examine the prevalence of Post-Traumatic Stress Disorder (PTSD) in victims-  
11 survivors of Intimate Partner Violence (IPV) consulting at the specialized and original facility  
12 “Maison des Femmes” (MdF) or in two close Municipal Health Centers (MHCs).  
13  
14 4 “Maison des Femmes” (MdF) or in two close Municipal Health Centers (MHCs).

15 5 **Design:** A mixed-methods study using a convergent parallel design from July 2020 to June 2021.

16 6 **Setting/participants:** A questionnaire was proposed to women aged 18 years and over having  
17 suffered from IPV, in the MdF and in two MHCs. We also conducted qualitative interviews with  
18 a sub-sample of the women, asking for victims-survivors’ perceptions of the effect of the MdF’s  
19 care.  
20  
21 8 a sub-sample of the women, asking for victims-survivors’ perceptions of the effect of the MdF’s  
22 care.  
23 9 care.

24 10 **Primary and secondary outcome measures:** Presence of a PTSD using the PTSD self-report  
25 checklist of symptoms (PCL-5), possibility of reaching women by phone 6 months after the  
26 inclusion visit, level of self-rated global health, number of emergency visits in the past 6 months,  
27 substances use, readiness to change and safety behaviors.  
28  
29 13 substances use, readiness to change and safety behaviors.

30 14 **Results:** A total of 67 women (mean age: 34 years[SD=9.7]) responded to our questionnaire.  
31 PTSD diagnosis was retained for 40 women (59.7%). Around 30% of participants self-rated their  
32 global health as bad. Less than 30% (n=18) of women were regular smokers, and only 7.5% of  
33 participants had a problematic alcohol use (Audit-C score  $\geq 4$ ), 19.4% women used psychotropic  
34 drugs. Six months after inclusion, a half of participants had been reached by phone. Analysis of  
35 the qualitative interviews clarified victims-survivors’ perceptions of the MdF’s specific care:  
36 social networking, multidisciplinary approach, specialized listening, healthcare facilities, evasion  
37 and “feeling at home”.  
38  
39 20 social networking, multidisciplinary approach, specialized listening, healthcare facilities, evasion  
40 and “feeling at home”.  
41  
42 21 and “feeling at home”.

43 22 **Conclusions:** The high prevalence of PTSD at inclusion was nearly the same between the three  
44 centers. This mixed-methods comparison will serve as a pilot study for a larger comparative trial  
45 to assess the long-term impact of the MdF’s specialized care on victims-survivors’ mental health,  
46 compared with the care of uncoordinated structures.  
47  
48 24 compared with the care of uncoordinated structures.

49 25 **Trial registration number:** NCT04304469  
50  
51  
52  
53  
54  
55  
56  
57  
58  
59  
60

## STRENGTHS AND LIMITATIONS OF THE STUDY

- This is the first study assessing the prevalence of post-traumatic stress disorders (PTSD) in victims-survivors of interpersonal violence in the Maison Des Femmes (MdF), being the first French structure dedicated to the care of women victims-survivors of violence.
- Our qualitative interviews outlined for the first time the perceptions of the women visiting the MdF.
- This study validates the feasibility of a future larger comparative trial.
- We did not collect data on other traumatic events, and health outcomes measured in this study are based solely on the women's self-reported perceptions.

## KEYWORDS

Gender-based violence

Intimate Partner violence

Mental health

Interdisciplinary care

## FUNDING STATEMENT

The study was funded by crowd funding and promoted by the Dijon Bourgogne's Teaching hospital.

## ETHICS APPROVAL AND CONSENT TO PARTICIPATE

The Committee for the Protection of Persons of Ile de France 6 provided ethical approval for this study (reference number 92-19 NI Cat.3, file number 19.12.10.36712).

Trained research assistants ask every participant for a written informed consent before recruitment.

## AVAILABILITY OF DATA AND MATERIALS

1  
2  
3 The datasets generated and analyzed during the current study are not publicly available due to  
4 their containing information that could compromise the privacy/safety of research participants but  
5 are available from the corresponding author on reasonable request.  
6

#### 7 AUTHOR'S DISCLOSURE

8  
9  
10 The authors declare that they have no competing interests.  
11  
12  
13

#### 14 WORD COUNT

15  
16  
17 2782  
18  
19  
20  
21  
22  
23  
24  
25  
26  
27  
28  
29  
30  
31  
32  
33  
34  
35  
36  
37  
38  
39  
40  
41  
42  
43  
44  
45  
46  
47  
48  
49  
50  
51  
52  
53  
54  
55  
56  
57  
58  
59  
60



# Post-traumatic stress disorders in women victims-survivors of violence: a pilot study in a French coordinated structure

## 1. INTRODUCTION

According to the WHO, violence against Women (VaW) is a global public health matter with significant physical and mental health-related consequences for the victims [1]. Intimate partner violence (IPV) is the most widespread form of VaW [2]. Worldwide, around 30% of girls and women aged 15 and older have experienced IPV in their lifetime[3]. IPV are associated with an increased risk of developing numerous short and long-term adverse psychological outcomes, including depression, generalized anxiety disorder, and Post-Traumatic Stress Disorder (PTSD) [4], a psychiatric disorder that may occur in people who have experienced, or witnessed, a traumatic event [5].

Women who experienced violence have specific needs, arising from the often-repeated and complex nature of the trauma [6]. They also tend to accumulate other risk factors for poor mental health, such as economic insecurity, parenting stress and social isolation [7]. In France, victims-survivors of IPV, especially the most socially disadvantaged ones, face multiple barriers to healthcare access [8]. Particularly, there is a lack of dedicated care facilities and providers trained in caring for these women's specific medical, psychosocial, parenting and judicial needs. French Health professionals are strongly encouraged to ask their female patients about any experience of physical or sexual violence [9]. But they have rarely received the specific training to deal with these issues with confidence and professionalism, and often lack the resources to refer women victims of IPV to appropriate care facilities and health providers.

1  
2  
3 46 As described in a recent publication [10], « La Maison des Femmes » (MdF, Women's Home),  
4  
5 47 established in 2016, is a medical and social structure specifically dedicated to provide  
6  
7 48 individualized multidisciplinary care for victims-survivors of VaW, such as IPV. It offers care  
8  
9 49 combining health, social and judicial aspects in a single structure. The MdF consists of 3 units: a  
10  
11 50 Family Planning Center (FPC, consultations for contraception and abortions), a violence care unit  
12  
13 51 (composed of psychiatrist, general practitioners, midwives, psychologists, social workers,  
14  
15 52 lawyers, police officers, and support groups) and a female genital mutilation care unit (surgeons  
16  
17 53 and sex therapists). The MdF is located in the poorest department in mainland France, Seine-  
18  
19 54 Saint-Denis, a department right next to Paris, where one in four women attending the FPCs  
20  
21 55 suffers, or has suffered, from IPV [10].  
22  
23  
24  
25  
26

27 56 Several structures providing coordinated multidisciplinary care, directly inspired by the model of  
28  
29 57 the Saint Denis women's center, have been created in France. As the economic model has not yet  
30  
31 58 been established, the question arises of evaluating the service provided by these coordinated care  
32  
33 59 structures, particularly in terms of their capacity to improve the mental health and reduce the  
34  
35 60 post-traumatic stress of women victims of IPV.  
36  
37  
38

39 61 The main objective of this study was to examine individual characteristics, and the prevalence of  
40  
41 62 PTSD, in victims-survivors of IPV consulting at the MdF or in two others FPCs located in the  
42  
43 63 same area of the Paris conurbation.  
44  
45

46 64  
47  
48  
49  
50  
51  
52  
53  
54  
55  
56  
57  
58  
59  
60

## 2. METHODS

### 2.1. Data source and study population

We carried out surveys from July 2020 to June 2021 in three Family Planning Centers (FPC): one in the Mdf, and 2 in Municipal Health Centers (MHC) from the same department (MHC 1 in Saint Denis, MHC 2 in Aubervilliers).

All women aged 18 years and over consulting in one of the three FPCs, having suffered or suffering from IPV and able to understand the objectives of the study were eligible (interpreters could be contacted by phone if necessary). Trained research assistants (RA) were available in each of the study centers to screen women for eligibility, explain the study, and ask for a written informed consent before recruitment. Women under 18 years old or under tutorship were excluded. RA also assisted participants in completing the questionnaire.

We contacted every participant by phone 6 months after.

### 2.2. Patient and public involvement

For security and confidentiality reasons, it was not appropriate or possible to involve patients or the public in the design, or conduct, or reporting, or dissemination plans of our research.

### 2.3. Outcome measures

Data were collected using a self-administered questionnaire that included questions about participants' socio-demographic characteristics, as well as a range of health and substance use data.

The main outcome was a PTSD diagnosis, measured using the PTSD self-report checklist of 20 PTSD symptoms defined in the DSM-5 (PCL-5) [11]. PCL-5 is a widely used self-administrated questionnaire to detect and evaluate a PTSD, with a validated French version [12]. Each item on

1  
2  
3 87 this scale is rated on a five-point Likert scale reflecting severity of a particular symptom from 0  
4  
5 88 (not at all) to 4 (extremely) during the past month, with a threshold score of 33.  
6  
7

8 89 Other outcomes included: the possibility of reaching women by phone 6 months after the  
9  
10 90 inclusion visit, the level of self-rated global health (Likert scale: “Very good”, “Good”, “Quite  
11  
12 91 good”, “Bad”, “Very Bad”), the self-reported number of emergency visits in the past 6 months,  
13  
14 92 the substances use: smoking status, alcohol (evaluated by the Alcohol Use Disorders  
15  
16 93 Identification Test-Consumption/AUDIT-C [13]), drugs (“Did you use hypnotics, sleep pills,  
17  
18 94 antidepressants or anxiolytics in the past 6 months ?”), the readiness to change, the safety  
19  
20 95 behaviors (evaluated by questions inspired by the Safety behavior Checklist [14]) and the help  
21  
22 96 seeking behaviors in the past 6 months (evaluated by questions inspired by Van Parys et al. [15]).  
23  
24  
25  
26

#### 27 97 2.4. Qualitative interviews

28  
29 98 We conducted semi-structured interviews with a sub-sample of the participants in the  
30  
31 99 MdF and in the MHC-1, according to the grounded theory. The interviews were all conducted by  
32  
33 100 the same researcher, a MD qualified in qualitative research who used an interview guide. The  
34  
35 101 interview guide was developed by the coauthors and reviewed and tested by 2 psychologists to  
36  
37 102 verify the comprehensibility of the questions. The guide included questions about: history of  
38  
39 103 violence, women’s perception of the effect of the care provided at MdF and in the MHC,  
40  
41 104 women’s perception of their needs and their mental and physical health. Interviews were  
42  
43 105 anonymized, transcribed, analyzed and interpreted following practical guidance for conducting  
44  
45 106 qualitative research [16].  
46  
47  
48  
49  
50

#### 51 107 2.5. Ethics

52  
53 108 The Committee for the Protection of Persons of ANONYMIZED provided ethical  
54  
55 109 approval for this study (ANONYMIZED). As recommended by the WHO, our study paid  
56  
57  
58  
59  
60

1  
2  
3 110 particular attention to minimizing the risk affecting the safety of the respondents: confidentiality,  
4  
5 111 safe climate at all time, informed consent, and basic care and support available locally for  
6  
7 112 victims-survivors [17].  
8  
9

## 10 11 113 2.6. Analysis

12  
13 114 This mixed-method study used a convergent parallel design [18]. Quantitative data  
14  
15 115 analysis was conducted using SAS for Windows (version 9.4). To describe the socio-  
16  
17 116 demographic characteristics, perceived social support, health and substance use indicators  
18  
19 117 descriptive statistics was used consisting of frequency, percentage, and mean and standard  
20  
21 118 deviation.  
22  
23  
24

25 119 As concerned the qualitative interviews, we conducted an inductive content analysis using a  
26  
27 120 grounded theory approach [19]. The qualitative data were analysed with NVivo V12 software.  
28  
29 121 The transcribed text was coded, then the codes were sorted into categories and main themes, and  
30  
31 122 were illustrated using verbatim quotations. We used a checklist of quality criteria (i.e. credibility,  
32  
33 123 dependability, conformability, transferability, and authenticit) to improve the trustworthiness of  
34  
35 124 our results [19].  
36  
37  
38  
39  
40  
41  
42

## 43 126 3. RESULTS

### 44 45 46 127 3.1. Sample description

47  
48 128 A total of 67 women responded to our questionnaire: 40 in the MdF, 12 in the MHC-1 and  
49  
50 129 15 in the MHC-2.  
51  
52

53  
54 130 The characteristics of study participants are described in Table 1. Majority of the participants  
55  
56 131 (57%) were aged below 35 years, with a mean age of 34 [SD=9.7], and had at least one child  
57  
58  
59

1  
2  
3 132 (73.1%). Slightly more than half of participants (53.0%) were not born in France. Around 25% of  
4  
5 133 participants (n=17) declared having no one to turn to for help or assistance if they needed it,  
6  
7 134 while more than one third (n=25) had at least two people to turn to for help.  
8  
9

10  
11 135 Six months after inclusion, a half of participants (52.2%) had been reached by phone (65.0% in  
12  
13 136 MdF, 25.0% in MHC1 and 40.0% in MHC2).  
14

### 15 16 137 3.2. Prevalence of PTSD 17

18 138 Participants reported an average PCL-5 score of 37.1(SD = 16.6) (Table 2). Forty women  
19  
20 139 (59.7%) had a PCL-5 score of at least 33, which is the recognized cut-off value for defining the  
21  
22 140 presence of PTSD diagnosis (table 2). The prevalence of PTSD was quite similar between the  
23  
24 141 three groups.  
25  
26

### 27 28 142 3.3. Health and substance use outcomes 29

30 143 Around 40% of participants (n=26) self-rated their global health as a good or very good.  
31  
32 144 The same percentage of participants reported consulting at an emergency room in the past 6  
33  
34 145 months.  
35  
36

37  
38 146 Less than 30% (n=18) of women were regular smokers, and only 7.5% of participants had a  
39  
40 147 problematic alcohol use with an Audit-C score greater than or equal to 4, one out of five women  
41  
42 148 used psychotropic drugs.  
43  
44

### 45 46 149 3.4. Qualitative data 47

48 150 For this pilot study, nine women have been interviewed (6 in the MdF, 3 in the MHC-1)  
49  
50 151 (Table 3, SUPPLEMENTARY).  
51  
52  
53  
54  
55  
56  
57  
58  
59  
60

1  
2  
3 152 They were aged 27 to 55 years old (mean age: 38.8), six were employed. Seven women  
4  
5 153 had at least one child. Only one was in a couple, and they have suffered from domestic violence  
6  
7  
8 154 between 1.5 and 13 years (mean: 5.4 years) (table 3).  
9

10  
11 155 With regard to the perception of difficulties encountered by the women victims of violence, four  
12  
13 156 main themes emerged from the thematic analysis: a feeling of loneliness, the need to be listened  
14  
15 157 to, the specificity of the symptoms of the victims-survivors, and the difficulties in accessing  
16  
17 158 healthcare (Figure 1).  
18

19  
20  
21 159 “I spend all day long alone like this, with my thoughts, I don’t know where to go, and I’m still  
22  
23 160 turning in circles...” (MHC1)  
24

25  
26 161 “In fact I think we should be in a bubble with psychologists all the time [laughs] to be listened  
27  
28 162 and to feel that we’re not alone.” (MHC2)  
29

30  
31 163 “We need real professionals, who understand what we’re going through” (MdF5)  
32

33  
34 164 “I wanted to go to another support group but I’ve been told that I have to wait because there are  
35  
36 165 too many people... I cried not because there was no room for me but because we are so many,  
37  
38 166 and there is no room for anyone...” (MdF3)  
39

40  
41  
42 167 With regards to the perception of the specific care of the MdF, six main themes emerged. Four of  
43  
44 168 them correspond to the four themes developed in figure 1: social networking, multidisciplinary  
45  
46 169 approach, specialized listening, healthcare facilities, and the other two themes highlight  
47  
48 170 additional advantages provided by the MdF: evasion, and “feeling at home” (figure 2).  
49

50  
51  
52 171 “We live in a society where we are forced to believe that women are our competitors... But here  
53  
54 172 we are sisters.” (MdF5)  
55

1  
2  
3 173 “That’s what interested me here, being able to get out of my head and to concentrate on a  
4  
5 174 physical activity [...] it makes it possible to find an appeasement, what I call a “air bubble” so I  
6  
7  
8 175 can restart” (Mdf4)

9  
10  
11 176 “I’m in a house here, it’s a house that is made for us [...]. There’s a roof like a house, I mean it’s  
12  
13 177 friendly, at first I said to myself “what am I doing here?” [...] and finally every time I come I can  
14  
15 178 say everything, I feel like it won’t come out the walls, I feel like whatever I say I won’t be  
16  
17  
18 179 judged”. (Mdf6)

## 21 180 4. DISCUSSION

22  
23  
24 181 This study highlights the very substantial (60%) prevalence of PTSD symptoms in a  
25  
26 182 sample of women who have experienced IPV and consulting at Family Planning Centers in the  
27  
28  
29 183 Parisian region.

30  
31 184 Our results have showed that the proportion of women suffering from PTSD is not different  
32  
33  
34 185 according to the care structure and have outlined the recruitment capacity for a future larger  
35  
36 186 study.

### 39 187 4.1. Prevalence of PTSD

40  
41 188 These results are consistent with those reported by other authors who have described an  
42  
43  
44 189 association between the exposure to IPV and the presence of PTSD [20,21]. The prevalence of  
45  
46 190 PTSD among victims-survivors of IPV varies depending on the studies and on the tool used to  
47  
48 191 quantify PTSD, ranging from 33 to 84%, with a mean of 61% [22].

49  
50  
51 192 To assess the benefit of a multidisciplinary and cooperated approach on the mental health of the  
52  
53  
54 193 victims-survivors, as the Mdf provides, a comparison between the three centers a few months  
55  
56 194 after the inclusion with a repeated measure of PTSD would be advisable. The fact that the



1  
2  
3 195 prevalence of PTSD at inclusion is nearly the same between the three centers in our study seems  
4  
5 196 to eliminate the bias of centers, and encourages us to consider a larger comparative study aiming  
6  
7 197 to compare the MdF long-term impact on the mental health of victims-survivors with the one of  
8  
9 198 standard-of-care structures. We were unable to contact a majority of women from the MHCs six  
10  
11 199 months after inclusion, whereas two out of three women from the MdF had been reached. This  
12  
13 200 could reinforce the fact that women may value the care provided by the MdF more than the one  
14  
15 201 provided by non-dedicated structures, but it will be an additional difficulty for a subsequent  
16  
17 202 comparative study.  
18  
19  
20  
21

#### 22 203 4.2. A multicomponent model

23  
24 204 The MdF is a structure that provides multicomponent trauma-informed and holistic care.  
25  
26 205 Getting out of IPV is a process with multiple stages [23]. Our qualitative results reinforce the fact  
27  
28 206 that MdF seems to fit to the needs of the victims-survivors throughout their trajectory. MdF  
29  
30 207 supplies essential interventions recommended by the WHO to prevent VaW [24]. These  
31  
32 208 interventions correspond to models presented as highly efficient to improve the mental health of  
33  
34 209 IPV survivors [25]. On the top of that, respondents also described the MdF as a warm place  
35  
36 210 where they could escape from reality, a new concept that needs to be explored in the future.  
37  
38  
39  
40

#### 41 211 4.3. Perspectives

42  
43 212 This study will serve as a basis for a larger comparative trial of the long-term impact of  
44  
45 213 specialized care of the MdF on PTSD compared to the care in non-specialized structures: the  
46  
47 214 “IRONND-L” study (“*Evaluation of the impact of the care of women victims of sexist and sexual*  
48  
49 215 *violence, according to a coordinated multidisciplinary approach in women's homes or traditional*  
50  
51 216 *health centers or family planning, on mental and physical health: a prospective, quasi-*  
52  
53 217 *experimental, multicenter, national study*”). We are planning a quantitative and a qualitative  
54  
55  
56  
57  
58  
59  
60

1  
2  
3 218 component, as well as a medico economic study. The main objective aims to assess the evolution  
4  
5 219 of PTSD between the initial visit and 6 months after in women victims-survivors of violence,  
6  
7  
8 220 according to whether they are treated in structures offering a coordinated multidisciplinary  
9  
10 221 approach (MdF), or in health centers or family planning. We also aim to assess the presence of  
11  
12 222 sleep disorders, the quality of life, the presence of depressive and anxiety symptoms, the use of  
13  
14 223 substances, the women's perception of their safety and well-being and that of their children.

15  
16  
17 224 In the pilot study, the mean PCL-5 score was = 37.1 (sd= 16.6). Therefore, a minimum of 150  
18  
19 225 women per group is required to achieve a power of 80% and 5% significance level (two-sided), to  
20  
21 226 detect a mean difference of 5.5 between the two groups, assuming that the standard deviation of  
22  
23 227 the differences is 17 (Figure 2). Thus, 200 women per group will need to be recruited to account  
24  
25 228 for a potential 35% rate of loss to follow-up. Therefore, we plan to include a total of 400 women  
26  
27 229 in the IROND-L study.

#### 31 32 230 4.4. Strengths and limitations

33  
34 231 This is the first French study assessing the prevalence of PTSD in victims-survivors of  
35  
36 232 IPV in MHCs and the MdF, being the first French structure dedicated to the care of women  
37  
38 233 victims of violence. The high prevalence of PTSD outlined in our study justifies the need for  
39  
40 234 launching larger quantitative and qualitative researches on the mental health of the victims.

41  
42  
43  
44 235 However, this study has several limitations. Firstly, it was conducted in health facilities and  
45  
46 236 therefore does not include women in IPV situations who do not have access to healthcare or those  
47  
48 237 who face significant barriers to seeking care. Nevertheless, we do not believe that our population  
49  
50 238 is biased towards more advantaged women. Indeed, even though limited, our sample embraces a  
51  
52 239 wide range of situations, with 53% of women born outside of France, 37% having social security  
53  
54 240 coverage reserved for those with no or low income from work or illegal immigrant status,  
55  
56  
57  
58  
59  
60

1  
2  
3 241 suggesting that the facilities where the study was conducted have a broad recruitment base.  
4  
5 242 Further, we did not collect data on other stressful or traumatic events. Moreover, health outcomes  
6  
7 243 measured in this study are based solely on the women's self-reported perceptions, rather than on  
8  
9 244 possibly more valid clinical observations. These limitations must be addressed in the future  
10  
11 245 questionnaire of the larger comparative trial.  
12  
13  
14

#### 15 246 4.5. Conclusions

16  
17 247 Given the links between violence and women's mental health found in this study,  
18  
19 248 recommendations to encourage clinicians to inquire about their patients' experiences of violence  
20  
21 249 should be maintained. However, health care providers also need to be properly trained and  
22  
23 250 informed to refer identified violence victims to appropriate adequate and trauma informed care.  
24  
25 251 The future IROND-L study needs to assess the effect of coordinated interventions such as the  
26  
27 252 ones offered at MdF on women's mental health. This future study is of particular importance as  
28  
29 253 the MDF model is to be duplicated throughout France, at the request of the French government  
30  
31 254 [26], and is part of an overall French national public health policy for the care of victims of  
32  
33 255 violence.  
34  
35  
36  
37  
38  
39  
40  
41  
42  
43  
44

## 45 AUTHOR STATEMENT

46  
47  
48 NR: Conceptualization, Methodology, Software, Investigation, Writing – Original Draft, Writing  
49 –Review and Editing

50 ND: Methodology, Software

51 FE-K: Conceptualization, Methodology, Writing –Review and Editing

52 MB: Conceptualization, Methodology, Supervision, Writing –Review and Editing

53 AB: Investigation

54 LY: Investigation  
55  
56  
57  
58  
59  
60

1  
2  
3 LF: Investigation  
4 GH: Investigation, Writing –Review and Editing  
5 SM: Writing –Review and Editing  
6

7 Each author has confirmed compliance with the journal’s requirements for authorship.  
8  
9

## 10 REFERENCES

- 11 1 World Health Organization. Violence against women: a ‘global health problem of epidemic proportions.’ 2013. <https://www.who.int/news/item/20-06-2013-violence-against-women-a-global-health-problem-of-epidemic-proportions-> (accessed 23 Feb 2023).
- 12 2 World Health Organization. Violence against women prevalence estimates, 2018: global, regional and national prevalence estimates for intimate partner violence against women and global and regional prevalence estimates for non-partner sexual violence against women. 2021.
- 13 3 Sardinha L, Maheu-Giroux M, Stöckl H, *et al*. Global, regional, and national prevalence estimates of physical or sexual, or both, intimate partner violence against women in 2018. *The Lancet* 2022;**0**. doi:10.1016/S0140-6736(21)02664-7
- 14 4 Trevillion K, Corker E, Capron LE, *et al*. Improving mental health service responses to domestic violence and abuse. *Int Rev Psychiatry* 2016;**28**:423–32. doi:10.1080/09540261.2016.1201053
- 15 5 Scott KM, Koenen KC, King A, *et al*. Post-traumatic stress disorder associated with sexual assault among women in the WHO World Mental Health Surveys. *Psychol Med* 2018;**48**:155–67. doi:10.1017/S0033291717001593
- 16 6 Ramsay J, Carter Y, Davidson L, *et al*. Advocacy interventions to reduce or eliminate violence and promote the physical and psychosocial well-being of women who experience intimate partner abuse. *Cochrane Database Syst Rev* 2009;:CD005043. doi:10.1002/14651858.CD005043.pub2
- 17 7 Breiding MJ, Basile KC, Klevens J, *et al*. Economic Insecurity and Intimate Partner and Sexual Violence Victimization. *American Journal of Preventive Medicine* 2017;**53**:457–64. doi:10.1016/j.amepre.2017.03.021
- 18 8 IGAS. La prise en charge à l’hôpital des femmes victimes de violence : éléments en vue d’une modélisation. <https://www.igas.gouv.fr/spip.php?article636> (accessed 13 Dec 2021).
- 19 9 HAS. Repérage des femmes victimes de violences au sein du couple. Haute Autorité de Santé. 2020. [https://www.has-sante.fr/jcms/p\\_3104867/fr/reperage-des-femmes-victimes-de-violences-au-sein-du-couple](https://www.has-sante.fr/jcms/p_3104867/fr/reperage-des-femmes-victimes-de-violences-au-sein-du-couple) (accessed 16 Sep 2021).

- 1  
2  
3 10 Roland N, Ahogbehossou Y, Hatem G, *et al.* Violence against women and perceived health: An observational survey of patients treated in the multidisciplinary structure “The Women’s House” and two Family Planning Centres in the metropolitan Paris area. *Health Soc Care Community* Published Online First: 22 March 2022. doi:10.1111/hsc.13797
- 4  
5  
6  
7  
8  
9 11 Blevins CA, Weathers FW, Davis MT, *et al.* The Posttraumatic Stress Disorder Checklist for DSM-5 (PCL-5): Development and Initial Psychometric Evaluation. *J Trauma Stress* 2015;**28**:489–98. doi:10.1002/jts.22059
- 10  
11  
12  
13 12 Ashbaugh AR, Houle-Johnson S, Herbert C, *et al.* Psychometric Validation of the English and French Versions of the Posttraumatic Stress Disorder Checklist for DSM-5 (PCL-5). *PLoS One* 2016;**11**:e0161645. doi:10.1371/journal.pone.0161645
- 14  
15  
16  
17 13 Bush K, Kivlahan DR, McDonell MB, *et al.* The AUDIT alcohol consumption questions (AUDIT-C): an effective brief screening test for problem drinking. Ambulatory Care Quality Improvement Project (ACQUIP). Alcohol Use Disorders Identification Test. *Arch Intern Med* 1998;**158**:1789–95. doi:10.1001/archinte.158.16.1789
- 18  
19  
20  
21  
22  
23 14 McFarlane JM, Groff JY, O’Brien JA, *et al.* Secondary prevention of intimate partner violence: a randomized controlled trial. *Nurs Res* 2006;**55**:52–61. doi:10.1097/00006199-200601000-00007
- 24  
25  
26  
27 15 Van Parys A-S, Deschepper E, Roelens K, *et al.* The impact of a referral card-based intervention on intimate partner violence, psychosocial health, help-seeking and safety behaviour during pregnancy and postpartum: a randomized controlled trial. *BMC Pregnancy Childbirth* 2017;**17**:346. doi:10.1186/s12884-017-1519-x
- 28  
29  
30  
31  
32  
33 16 Moser A, Korstjens I. Series: Practical guidance to qualitative research. Part 1: Introduction. *European Journal of General Practice* 2017;**23**:271–3. doi:10.1080/13814788.2017.1375093
- 34  
35  
36  
37 17 World Health Organization. WHO Ethical and safety recommendations for researching, documenting and monitoring sexual violence in emergencies. 2007. <https://www.who.int/publications/i/item/9789241595681> (accessed 28 Jul 2022).
- 38  
39  
40  
41 18 Creswell JW, Clark VLP. *Designing and Conducting Mixed Methods Research*. SAGE Publications 2017.
- 42  
43  
44 19 Kyngäs H, Kääriäinen M, Elo S. The Trustworthiness of Content Analysis. 2020. 41–8. doi:10.1007/978-3-030-30199-6\_5
- 45  
46  
47  
48 20 Pill N, Day A, Mildred H. Trauma responses to intimate partner violence: A review of current knowledge. *Aggression and Violent Behavior* 2017;**34**:178–84. doi:10.1016/j.avb.2017.01.014
- 49  
50  
51  
52 21 Pemberton JV, Loeb TB. Impact of Sexual and Interpersonal Violence and Trauma on Women: Trauma-Informed Practice and Feminist Theory. *Journal of Feminist Family Therapy* 2020;**32**:115–31. doi:10.1080/08952833.2020.1793564
- 53  
54  
55  
56  
57  
58  
59  
60

- 1  
2  
3 22 Woods S. Prevalence and Patterns of Posttraumatic Stress Disorder in Abused and  
4 Postabused Women. *Issues in Mental Health Nursing*, 2000;**21**:309–24.  
5  
6  
7 23 Dziewa A, Glowacz F. “Getting out from Intimate Partner Violence: Dynamics and  
8 Processes. A Qualitative Analysis of Female and Male Victims’ Narratives”. *J Fam Violence*  
9 2022;**37**:643–56. doi:10.1007/s10896-020-00245-2  
10  
11 24 World Health Organization. RESPECT women: Preventing violence against women.  
12 2019. [https://apps-who-](https://apps-who-int.proxy.insermbiblio.inist.fr/iris/bitstream/handle/10665/312261/WHO-RHR-18.19-eng.pdf?ua=1)  
13 [int.proxy.insermbiblio.inist.fr/iris/bitstream/handle/10665/312261/WHO-RHR-18.19-](https://apps-who-int.proxy.insermbiblio.inist.fr/iris/bitstream/handle/10665/312261/WHO-RHR-18.19-eng.pdf?ua=1)  
14 [eng.pdf?ua=1](https://apps-who-int.proxy.insermbiblio.inist.fr/iris/bitstream/handle/10665/312261/WHO-RHR-18.19-eng.pdf?ua=1) (accessed 28 Jul 2022).  
15  
16  
17 25 Paphitis SA, Bentley A, Asher L, *et al.* Improving the mental health of women intimate  
18 partner violence survivors: Findings from a realist review of psychosocial interventions.  
19 *PLOS ONE* 2022;**17**:e0264845. doi:10.1371/journal.pone.0264845  
20  
21 26 French Government. Présentation du plan interministériel pour l’égalité entre les femmes et  
22 les hommes 2023-2027/Presentation of the interministerial plan for equality between women  
23 and men 2023-2027. 2023. [https://www.gouvernement.fr/communique/presentation-du-plan-](https://www.gouvernement.fr/communique/presentation-du-plan-interministeriel-pour-egalite-entre-les-femmes-et-les-hommes-2023-2027)  
24 [interministeriel-pour-egalite-entre-les-femmes-et-les-hommes-2023-2027](https://www.gouvernement.fr/communique/presentation-du-plan-interministeriel-pour-egalite-entre-les-femmes-et-les-hommes-2023-2027)  
25  
26  
27  
28  
29  
30  
31  
32  
33  
34  
35  
36  
37  
38  
39  
40  
41  
42  
43  
44  
45  
46  
47  
48  
49  
50  
51  
52  
53  
54  
55  
56  
57  
58  
59  
60

## TABLES

Table 1: Sociodemographic characteristics of study participants (n=67)

|                                                    | ALL<br>N=67<br>% (n) | Maison des Femmes<br>N=40<br>% (n) | MHC-1<br>N=12<br>% (n) | MHC-2<br>N=15<br>% (n) |
|----------------------------------------------------|----------------------|------------------------------------|------------------------|------------------------|
| <b>Age (years) (n=67)</b>                          |                      |                                    |                        |                        |
| Mean [SD, range]                                   | 34.1 [9.7, 18-71]    | 31.3 [8.2, 18-71]                  | 40.3 [8.7, 29-55]      | 36.5 [10.0, 21-52]     |
| Median                                             | 33                   | 29                                 | 37                     | 37                     |
| <b>Ages (years, 4 classes)</b>                     |                      |                                    |                        |                        |
| 18-24                                              | 14.9 (10)            | 20.0 (8)                           | 0 (0)                  | 13.3 (2)               |
| 25-34                                              | 41.8 (28)            | 52.5 (21)                          | 25.0 (3)               | 26.7 (4)               |
| 35-49                                              | 34.3 (23)            | 25.0 (10)                          | 50.0 (6)               | 46.7 (7)               |
| ≥50                                                | 9.0 (6)              | 2.5 (1)                            | 25.0 (3)               | 13.3 (2)               |
| <b>In a couple (n=67)</b>                          |                      |                                    |                        |                        |
| Yes                                                | 49.2 (33)            | 50.0 (20)                          | 50.0 (6)               | 46.7 (7)               |
| <b>In a couple for (n=32)</b>                      |                      |                                    |                        |                        |
| Less than a year                                   | 25.0 (8)             | 10.0 (4)                           | 20.0 (1)               | 42.8 (3)               |
| 1-5 years                                          | 37.5 (12)            | 20.0 (8)                           | 40.0 (2)               | 28.6 (2)               |
| 6-15 years                                         | 28.1 (9)             | 15.0 (6)                           | 40.0 (2)               | 14.3 (1)               |
| >15 years                                          | 9.4 (3)              | 5.0 (2)                            | 0 (0)                  | 14.3 (1)               |
| <b>Has children (n=67)</b>                         |                      |                                    |                        |                        |
| Yes                                                | 73.1 (49)            | 67.5 (27)                          | 83.3 (10)              | 80.0 (12)              |
| <b>Housing situation (n=66)</b>                    |                      |                                    |                        |                        |
| Lives alone (tenant or owner of the house)         | 51.5 (34)            | 51.3 (20)                          | 58.3 (7)               | 46.7 (7)               |
| Lives with (ex)spouse (tenant or owner)            | 13.6 (9)             | 18.0 (7)                           | 0 (0)                  | 13.3 (2)               |
| (Ex)spouse alone (tenant or owner of the dwelling) | 1.5 (1)              | 0 (0)                              | 0 (0)                  | 6.7 (1)                |
| Staying with family/friends                        | 24.2 (16)            | 20.5 (8)                           | 33.3 (4)               | 26.7 (4)               |
| Staying in a hostel                                | 9.1 (6)              | 10.3 (4)                           | 8.3 (1)                | 6.7 (1)                |
| <b>Born in France (n=66)</b>                       |                      |                                    |                        |                        |
| Yes                                                | 47.0 (31)            | 43.6 (17)                          | 50.0 (6)               | 53.3 (8)               |
| <b>Geographic origin (n=62)</b>                    |                      |                                    |                        |                        |
| North Africa                                       | 24.2 (15)            | 21.1 (8)                           | 25.0 (3)               | 33.3 (4)               |
| Sub-Saharan Africa                                 | 43.5 (27)            | 52.6 (20)                          | 33.3 (4)               | 25.0 (3)               |
| Caribbean/Americas                                 | 8.1 (5)              | 10.5 (4)                           | 8.3 (1)                | 0 (0)                  |
| Asia/Middle East                                   | 3.2 (2)              | 0 (0)                              | (0)                    | 16.7 (2)               |
| Europe outside France                              | 4.8 (3)              | 5.3 (2)                            | (0)                    | 8.3 (1)                |

1  
2  
3  
4  
5  
6  
7  
8  
9  
10  
11  
12  
13  
14  
15  
16  
17  
18  
19  
20  
21  
22  
23  
24  
25  
26  
27  
28  
29  
30  
31  
32  
33  
34  
35  
36  
37  
38  
39  
40  
41  
42  
43  
44  
45  
46  
47  
48  
49  
50  
51  
52  
53  
54  
55  
56  
57  
58  
59  
60

|                                                                              |           |           |          |          |
|------------------------------------------------------------------------------|-----------|-----------|----------|----------|
| France                                                                       | 16.1 (10) | 10.5 (4)  | 33.3 (4) | 16.7 (2) |
| <b>Health coverage (n=67)</b>                                                |           |           |          |          |
| Health insurance                                                             | 44.8 (30) | 37.5 (15) | 66.7 (8) | 46.7 (7) |
| Social security                                                              | 17.9 (12) | 22.5 (9)  | 0 (0)    | 20.0 (3) |
| Universal Health Coverage (CMU)                                              | 25.4 (17) | 30.0 (12) | 16.7 (2) | 20.0 (3) |
| State medical assistance (AME)                                               | 4.5 (3)   | 0 (0)     | 16.7 (2) | 6.7 (1)  |
| No coverage                                                                  | 7.5 (5)   | 10.0 (4)  | 0 (0)    | 6.7 (1)  |
| <b>Professional situation (n=66)</b>                                         |           |           |          |          |
| Inactive                                                                     | 39.4 (26) | 38.5 (15) | 16.7 (2) | 60.0 (9) |
| Unemployed                                                                   | 13.6 (9)  | 10.3 (4)  | 25.0 (3) | 13.3 (2) |
| Working                                                                      | 37.9 (25) | 38.5 (15) | 58.3 (7) | 20.0 (3) |
| Student                                                                      | 9.1 (6)   | 12.8 (5)  | 0 (0)    | 6.7 (1)  |
| <b>Level of education (n=67)</b>                                             |           |           |          |          |
| No diploma                                                                   | 20.9 (14) | 20.0 (8)  | 16.7 (2) | 26.7 (4) |
| French Baccalaureate or equivalent                                           | 16.4 (11) | 20.0 (8)  | 8.3 (1)  | 13.3 (2) |
| Undergraduate (Bac +2)                                                       | 28.4 (19) | 25.0 (10) | 41.7 (5) | 26.7 (4) |
| Vocational education (CAP/BEP)                                               | 20.9 (14) | 20.0 (8)  | 16.7 (2) | 26.7 (4) |
| Primary or elementary education                                              | 13.4 (9)  | 15.0 (6)  | 16.7 (2) | 6.7 (1)  |
| <b>Monthly household income (n=67)</b>                                       |           |           |          |          |
| < 850 €                                                                      | 37.3 (25) | 37.5 (15) | 25.0 (3) | 46.7 (7) |
| 850 € à 1100 €                                                               | 9.1 (6)   | 10.0 (4)  | 16.7 (2) | 0 (0)    |
| 1100 € à 1800 €                                                              | 35.8 (24) | 30.0 (12) | 41.7 (5) | 46.7 (7) |
| 1800 € à 2500 €                                                              | 10.5 (7)  | 12.5 (5)  | 16.7 (2) | 0 (0)    |
| >2500 €                                                                      | 7.5 (5)   | 10.0 (4)  | 0 (0)    | 6.7 (1)  |
| <b>Support (n=67)</b>                                                        |           |           |          |          |
| No one                                                                       | 25.4 (17) | 22.5 (9)  | 33.3 (4) | 26.7 (4) |
| One people                                                                   | 37.3 (25) | 45.0 (18) | 25.0 (3) | 26.7 (4) |
| At least 2 peoples                                                           | 37.3 (25) | 32.5 (13) | 41.7 (5) | 46.7 (7) |
| <b>Number of women that can be reached by phone 6 months after inclusion</b> |           |           |          |          |
|                                                                              | 52.2 (35) | 65.0 (26) | 25.0 (3) | 40.0 (6) |
| <b>Safety precaution (n=67)</b>                                              |           |           |          |          |
| 1                                                                            | 3.0 (2)   | 2.5 (1)   | 8.3 (1)  | 0 (0)    |
| 2                                                                            | 10.6 (7)  | 10.0 (4)  | 8.3 (1)  | 14.3 (2) |
| 3                                                                            | 19.7 (13) | 17.5 (7)  | 25.0 (3) | 21.4 (3) |
| 4 (None)                                                                     | 66.7 (44) | 70.0 (28) | 58.3 (7) | 64.3 (9) |
| <b>Willingness to change (n=67)</b>                                          |           |           |          |          |



|    |                            |           |           |          |          |
|----|----------------------------|-----------|-----------|----------|----------|
| 1  |                            |           |           |          |          |
| 2  |                            |           |           |          |          |
| 3  | 0 (None)                   | 26.9 (18) | 27.5 (11) | 25.0 (3) | 26.7 (4) |
| 4  | 1                          | 23.9 (16) | 27.5 (11) | 25.0 (3) | 13.3 (2) |
| 5  | 2                          | 49.3 (33) | 45.0 (18) | 50.0 (6) | 60.0 (9) |
| 6  |                            |           |           |          |          |
| 7  | <b>Help seeking (n=67)</b> |           |           |          |          |
| 8  | 0                          | 7.5 (5)   | 7.5 (3)   | 0 (0)    | 13.3 (2) |
| 9  | 1                          | 6.0 (4)   | 5.0 (2)   | 16.7 (2) | 0 (0)    |
| 10 | 2                          | 9.0 (6)   | 7.5 (3)   | 0 (0)    | 20.0 (3) |
| 11 | 3                          | 25.4 (17) | 22.5 (9)  | 33.3 (4) | 26.7 (4) |
| 12 | 4                          | 19.4 (13) | 20.0 (8)  | 33.3 (4) | 6.7 (1)  |
| 13 | 5                          | 22.4 (15) | 20.0 (8)  | 16.7 (2) | 33.3 (5) |
| 14 | 6 (None)                   | 10.5 (7)  | 17.5 (7)  | 0 (0)    | 0 (0)    |
| 15 |                            |           |           |          |          |
| 16 |                            |           |           |          |          |
| 17 |                            |           |           |          |          |
| 18 |                            |           |           |          |          |
| 19 |                            |           |           |          |          |

Table 2: Medical characteristics of study participants (n=67)

|    | <b>ALL</b><br>N=67<br>% (n)                         | <b>Maison des Femmes</b><br>N=40<br>% (n) | <b>MHC-1</b><br>N=12<br>% (n) | <b>MHC-2</b><br>N=15<br>% (n) |
|----|-----------------------------------------------------|-------------------------------------------|-------------------------------|-------------------------------|
| 27 | <b>PCL-5</b>                                        |                                           |                               |                               |
| 28 | Mean [SD]                                           | 37.1 [16.6]                               | 37.7 [18.1]                   | 35.7 [13.7]                   |
| 29 | Score $\geq$ 33                                     | 59.7 (40)                                 | 57.5 (23)                     | 60.0 (9)                      |
| 30 | <b>Self-rated Global health</b>                     |                                           |                               |                               |
| 31 | Very Bad                                            | 10.6 (7)                                  | 12.5 (5)                      | 9.0 (1)                       |
| 32 | Bad                                                 | 23.3 (16)                                 | 20.0 (8)                      | 36.4 (4)                      |
| 33 | Quite Good                                          | 25.8 (17)                                 | 25.0 (10)                     | 27.3 (3)                      |
| 34 | Good                                                | 31.8 (21)                                 | 35.0 (14)                     | 18.2 (2)                      |
| 35 | Very Good                                           | 7.6 (5)                                   | 7.5 (3)                       | 9.0 (1)                       |
| 36 | <b>Emergency Room visit(s) in the past 6 months</b> |                                           |                               |                               |
| 37 | Yes                                                 | 40.3 (27)                                 | 47.5 (19)                     | 25.0 (3)                      |
| 38 | <b>Active Smoker</b>                                |                                           |                               |                               |
| 39 | Yes                                                 | 26.9 (18)                                 | 27.5 (11)                     | 33.3 (5)                      |
| 40 | <b>AUDIT-C<math>\geq</math>4</b>                    |                                           |                               |                               |
| 41 | Yes                                                 | 7.5 (5)                                   | 10.0 (4)                      | 6.7 (1)                       |
| 42 | <b>Use of Psychotropic Drugs</b>                    |                                           |                               |                               |
| 43 | Yes                                                 | 19.4 (13)                                 | 20.0 (8)                      | 20.0 (3)                      |
| 44 |                                                     |                                           |                               |                               |
| 45 |                                                     |                                           |                               |                               |
| 46 |                                                     |                                           |                               |                               |
| 47 |                                                     |                                           |                               |                               |
| 48 |                                                     |                                           |                               |                               |
| 49 |                                                     |                                           |                               |                               |
| 50 |                                                     |                                           |                               |                               |
| 51 |                                                     |                                           |                               |                               |
| 52 |                                                     |                                           |                               |                               |
| 53 |                                                     |                                           |                               |                               |
| 54 |                                                     |                                           |                               |                               |
| 55 |                                                     |                                           |                               |                               |
| 56 |                                                     |                                           |                               |                               |
| 57 |                                                     |                                           |                               |                               |
| 58 |                                                     |                                           |                               |                               |
| 59 |                                                     |                                           |                               |                               |
| 60 |                                                     |                                           |                               |                               |

# FIGURES

Figure 1: Perception of the difficulties encountered by the victims-survivors of violence

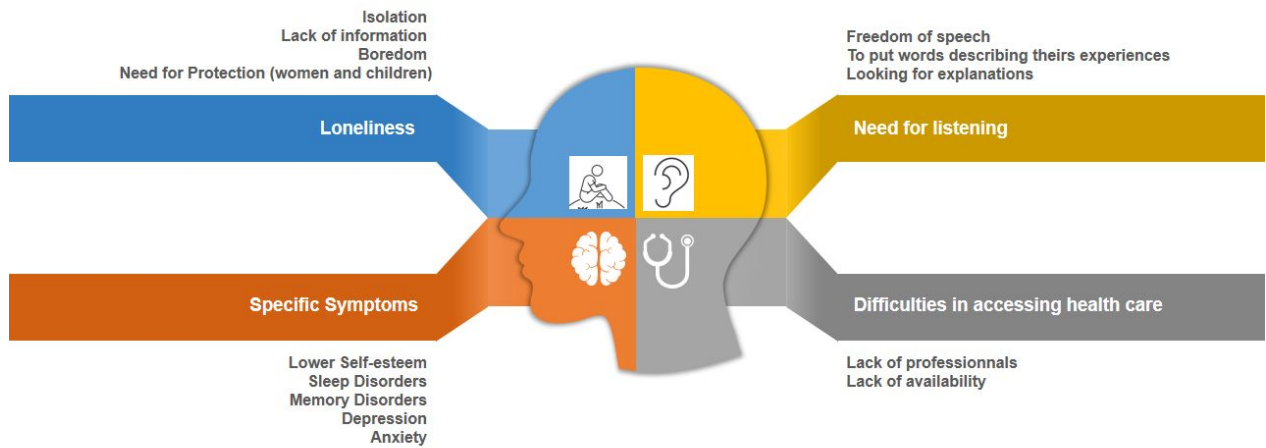

Figure 2: Perceptions of the specific care of the Maison des Femmes

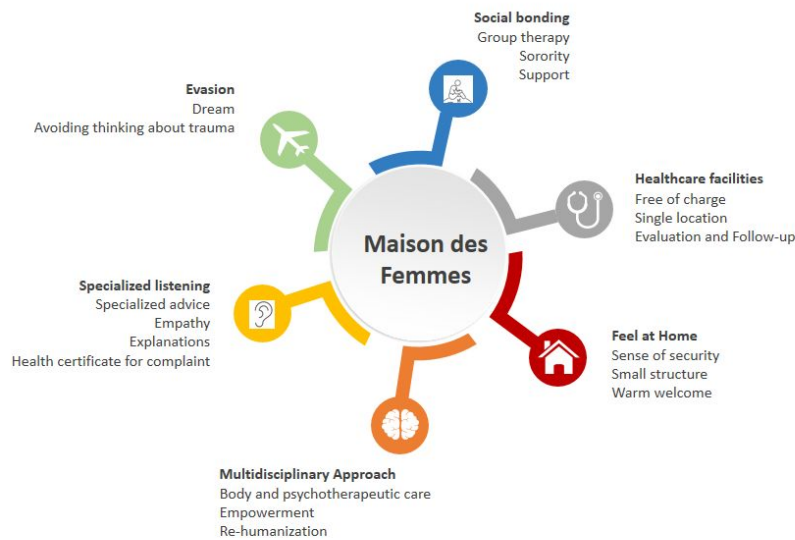

## SUPPLEMENTARY MATERIALS

Table 1: Sociodemographic description of the women interviewed in the qualitative study (N=9)

|             | Age (years) | Employment | Duration of the violence (years) | Marital status         | Number of children |
|-------------|-------------|------------|----------------------------------|------------------------|--------------------|
| <b>MdF1</b> | 27          | Inactive   | 3                                | Unmarried cohabitation | 1                  |
| <b>MdF2</b> | 37          | Active     | 6                                | Single                 | 1                  |
| <b>MdF3</b> | 41          | Inactive   | 6                                | Single                 | 0                  |
| <b>MHC1</b> | 34          | Active     | 9                                | Single                 | 2                  |
| <b>MdF4</b> | 43          | Active     | unknown                          | Single                 | 3                  |
| <b>MdF5</b> | 48          | Inactive   | 13                               | Single                 | 1                  |
| <b>MdF6</b> | 34          | Active     | 3                                | Single                 | 0                  |
| <b>MHC2</b> | 55          | Inactive   | 2                                | Single                 | 1                  |
| <b>MHC3</b> | 30          | Active     | 1.5                              | Single                 | 1                  |

1  
2  
3  
4  
5  
6  
7  
8  
9  
10  
11  
12  
13  
14  
15  
16  
17  
18  
19  
20  
21  
22  
23  
24  
25  
26  
27  
28  
29  
30  
31  
32  
33  
34  
35  
36  
37  
38  
39  
40  
41  
42  
43  
44  
45  
46

## Post-traumatic stress disorders in women victims-survivors of violence: a pilot study in a French coordinated structure

### STROBE 2007 (v4) Statement—Checklist of items that should be included in reports of *cohort studies*

| Section/Topic                | Item # | Recommendation                                                                                                                                                                       | Reported on page # |
|------------------------------|--------|--------------------------------------------------------------------------------------------------------------------------------------------------------------------------------------|--------------------|
| Title and abstract           | 1      | (a) Indicate the study's design with a commonly used term in the title or the abstract                                                                                               | 1                  |
|                              |        | (b) Provide in the abstract an informative and balanced summary of what was done and what was found                                                                                  | 1                  |
| <b>Introduction</b>          |        |                                                                                                                                                                                      |                    |
| Background/rationale         | 2      | Explain the scientific background and rationale for the investigation being reported                                                                                                 | 4                  |
| Objectives                   | 3      | State specific objectives, including any prespecified hypotheses                                                                                                                     | 5                  |
| <b>Methods</b>               |        |                                                                                                                                                                                      |                    |
| Study design                 | 4      | Present key elements of study design early in the paper                                                                                                                              | 6                  |
| Setting                      | 5      | Describe the setting, locations, and relevant dates, including periods of recruitment, exposure, follow-up, and data collection                                                      | 6                  |
| Participants                 | 6      | (a) Give the eligibility criteria, and the sources and methods of selection of participants. Describe methods of follow-up                                                           | 6                  |
|                              |        | (b) For matched studies, give matching criteria and number of exposed and unexposed                                                                                                  | NA                 |
| Variables                    | 7      | Clearly define all outcomes, exposures, predictors, potential confounders, and effect modifiers. Give diagnostic criteria, if applicable                                             | 6-7                |
| Data sources/<br>measurement | 8*     | For each variable of interest, give sources of data and details of methods of assessment (measurement). Describe comparability of assessment methods if there is more than one group | 6                  |
| Bias                         | 9      | Describe any efforts to address potential sources of bias                                                                                                                            | 6                  |
| Study size                   | 10     | Explain how the study size was arrived at                                                                                                                                            | 6                  |
| Quantitative variables       | 11     | Explain how quantitative variables were handled in the analyses. If applicable, describe which groupings were chosen and why                                                         | 6                  |
| Statistical methods          | 12     | (a) Describe all statistical methods, including those used to control for confounding                                                                                                | 8                  |
|                              |        | (b) Describe any methods used to examine subgroups and interactions                                                                                                                  | 8                  |

|                          |     |                                                                                                                                                                                                              |       |
|--------------------------|-----|--------------------------------------------------------------------------------------------------------------------------------------------------------------------------------------------------------------|-------|
|                          |     | (c) Explain how missing data were addressed                                                                                                                                                                  | 6     |
|                          |     | (d) If applicable, explain how loss to follow-up was addressed                                                                                                                                               | NA    |
|                          |     | (e) Describe any sensitivity analyses                                                                                                                                                                        | NA    |
| <b>Results</b>           |     |                                                                                                                                                                                                              |       |
| Participants             | 13* | (a) Report numbers of individuals at each stage of study—eg numbers potentially eligible, examined for eligibility, confirmed eligible, included in the study, completing follow-up, and analysed            | 8     |
|                          |     | (b) Give reasons for non-participation at each stage                                                                                                                                                         | 8     |
|                          |     | (c) Consider use of a flow diagram                                                                                                                                                                           | NA    |
| Descriptive data         | 14* | (a) Give characteristics of study participants (eg demographic, clinical, social) and information on exposures and potential confounders                                                                     | 9     |
|                          |     | (b) Indicate number of participants with missing data for each variable of interest                                                                                                                          | NA    |
|                          |     | (c) Summarise follow-up time (eg, average and total amount)                                                                                                                                                  | 6     |
| Outcome data             | 15* | Report numbers of outcome events or summary measures over time                                                                                                                                               | 9     |
| Main results             | 16  | (a) Give unadjusted estimates and, if applicable, confounder-adjusted estimates and their precision (eg, 95% confidence interval). Make clear which confounders were adjusted for and why they were included | 9     |
|                          |     | (b) Report category boundaries when continuous variables were categorized                                                                                                                                    | 9     |
|                          |     | (c) If relevant, consider translating estimates of relative risk into absolute risk for a meaningful time period                                                                                             | NA    |
| Other analyses           | 17  | Report other analyses done—eg analyses of subgroups and interactions, and sensitivity analyses                                                                                                               | NA    |
| <b>Discussion</b>        |     |                                                                                                                                                                                                              |       |
| Key results              | 18  | Summarise key results with reference to study objectives                                                                                                                                                     | 11    |
| <b>Limitations</b>       |     |                                                                                                                                                                                                              |       |
| Interpretation           | 20  | Give a cautious overall interpretation of results considering objectives, limitations, multiplicity of analyses, results from similar studies, and other relevant evidence                                   | 11-12 |
| Generalisability         | 21  | Discuss the generalisability (external validity) of the study results                                                                                                                                        | 12-13 |
| <b>Other information</b> |     |                                                                                                                                                                                                              |       |
| Funding                  | 22  | Give the source of funding and the role of the funders for the present study and, if applicable, for the original study on which the present article is based                                                | 2     |

\*Give information separately for cases and controls in case-control studies and, if applicable, for exposed and unexposed groups in cohort and cross-sectional studies.

1  
2 **Note:** An Explanation and Elaboration article discusses each checklist item and gives methodological background and published examples of transparent reporting. The STROBE  
3 checklist is best used in conjunction with this article (freely available on the Web sites of PLoS Medicine at <http://www.plosmedicine.org/>, Annals of Internal Medicine at  
4 <http://www.annals.org/>, and Epidemiology at <http://www.epidem.com/>). Information on the STROBE Initiative is available at [www.strobe-statement.org](http://www.strobe-statement.org).  
5  
6  
7  
8  
9  
10  
11  
12  
13  
14  
15  
16  
17  
18  
19  
20  
21  
22  
23  
24  
25  
26  
27  
28  
29  
30  
31  
32  
33  
34  
35  
36  
37  
38  
39  
40  
41  
42  
43  
44  
45  
46

For peer review only

# BMJ Open

## Post-traumatic stress disorders in women victims-survivors of intimate partner violence: a mixed-methods pilot study in a French coordinated structure

|                                 |                                                                                                                                                                                                                                                                                                                                                                                                                                                                                                                                                                                                      |
|---------------------------------|------------------------------------------------------------------------------------------------------------------------------------------------------------------------------------------------------------------------------------------------------------------------------------------------------------------------------------------------------------------------------------------------------------------------------------------------------------------------------------------------------------------------------------------------------------------------------------------------------|
| Journal:                        | <i>BMJ Open</i>                                                                                                                                                                                                                                                                                                                                                                                                                                                                                                                                                                                      |
| Manuscript ID                   | bmjopen-2023-075552.R1                                                                                                                                                                                                                                                                                                                                                                                                                                                                                                                                                                               |
| Article Type:                   | Original research                                                                                                                                                                                                                                                                                                                                                                                                                                                                                                                                                                                    |
| Date Submitted by the Author:   | 28-Nov-2023                                                                                                                                                                                                                                                                                                                                                                                                                                                                                                                                                                                          |
| Complete List of Authors:       | ROLAND, NOEMIE; Centre Hospitalier de Saint-Denis Hôpital Delafontaine, Maison des Femmes<br>Delmas, Noëlla; iPLESP<br>El Khoury, Fabienne; iPLESP<br>Bardou, Alice; Centre Hospitalier de Saint-Denis Hôpital Delafontaine<br>Yacini, Leila; Centre de Santé Municipal "Les Moulins"<br>Feldmann, Laure; Centre de Santé Municipal "Dr Pesqué"<br>Hatem, Ghada; Centre Hospitalier de Saint Denis, Département de Gynécologie et d'Obstétrique<br>Mahdjoub, Sarah; iPLESP<br>Bardou, Marc; Université de Bourgogne, CIC 1432 (Center for Clinical Investigation; Université Bourgogne Franche-Comté |
| <b>Primary Subject Heading</b>: | Mental health                                                                                                                                                                                                                                                                                                                                                                                                                                                                                                                                                                                        |
| Secondary Subject Heading:      | Epidemiology, Obstetrics and gynaecology, Reproductive medicine, Public health                                                                                                                                                                                                                                                                                                                                                                                                                                                                                                                       |
| Keywords:                       | MENTAL HEALTH, GYNAECOLOGY, EPIDEMIOLOGY                                                                                                                                                                                                                                                                                                                                                                                                                                                                                                                                                             |
|                                 |                                                                                                                                                                                                                                                                                                                                                                                                                                                                                                                                                                                                      |

SCHOLARONE™  
Manuscripts

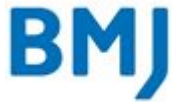

I, the Submitting Author has the right to grant and does grant on behalf of all authors of the Work (as defined in the below author licence), an exclusive licence and/or a non-exclusive licence for contributions from authors who are: i) UK Crown employees; ii) where BMJ has agreed a CC-BY licence shall apply, and/or iii) in accordance with the terms applicable for US Federal Government officers or employees acting as part of their official duties; on a worldwide, perpetual, irrevocable, royalty-free basis to BMJ Publishing Group Ltd ("BMJ") its licensees and where the relevant Journal is co-owned by BMJ to the co-owners of the Journal, to publish the Work in this journal and any other BMJ products and to exploit all rights, as set out in our [licence](#).

The Submitting Author accepts and understands that any supply made under these terms is made by BMJ to the Submitting Author unless you are acting as an employee on behalf of your employer or a postgraduate student of an affiliated institution which is paying any applicable article publishing charge ("APC") for Open Access articles. Where the Submitting Author wishes to make the Work available on an Open Access basis (and intends to pay the relevant APC), the terms of reuse of such Open Access shall be governed by a Creative Commons licence – details of these licences and which [Creative Commons](#) licence will apply to this Work are set out in our licence referred to above.

Other than as permitted in any relevant BMJ Author's Self Archiving Policies, I confirm this Work has not been accepted for publication elsewhere, is not being considered for publication elsewhere and does not duplicate material already published. I confirm all authors consent to publication of this Work and authorise the granting of this licence.



1  
2  
3 1 **Post-traumatic stress disorders in women victims-survivors of**  
4  
5  
6 2 **intimate partner violence: a mixed-methods pilot study in a French**  
7  
8  
9 3 **coordinated structure**  
10  
11  
12 4

14 5 Noémie Roland<sup>a\*</sup>(MD, PhD), Noëlla Delmas<sup>b\*</sup>(MPH), Fabienne El-Khoury<sup>b</sup> (PhD), Alice  
15  
16 6 Bardou<sup>a</sup>, Leila Yacini<sup>c</sup> (MD), Laure Feldmann<sup>d</sup> (MD), Ghada Hatem<sup>a,e</sup> (MD), Sarah Mahdjoub<sup>b</sup>  
17  
18 7 (PhD), Marc Bardou<sup>f,g</sup> (MD, PhD)  
19  
20  
21 8

22  
23  
24 9 **Affiliations:**

25  
26 10 <sup>a</sup>La Maison des femmes, 1 Chemin du Moulin Basset, 93200 Saint-Denis, France. ++33 1 55 87  
27  
28 11 42 32 [noemie.roland@assurance-maladie.fr](mailto:noemie.roland@assurance-maladie.fr)

29  
30 12 <sup>b</sup>Sorbonne Université, INSERM, Institut Pierre Louis d'Epidémiologie et de Santé  
31  
32 13 Publique, IPLESP, équipe de recherche en épidémiologie sociale, F75012 Paris, France.

33  
34 14 <sup>c</sup> Centre de Santé Municipal “Les Moulins”, 24 rue du Auguste Poullain 93200 Saint-Denis, France.

35  
36 15 <sup>d</sup> Centre de Santé Municipal “Docteur Pesqué”, 5 rue du Dr Pesqué 93300 Aubervilliers, France.

37  
38 16 <sup>e</sup> Service de gynécologie et obstétrique, Centre Hospitalier de Saint Denis. 2 Rue du Dr  
39  
40 17 Delafontaine, 93200 Saint-Denis, France.

41  
42 18 <sup>f</sup> CIC 1432 (Center for Clinical Investigation), CHU Dijon Bourgogne, 14 rue Gaffarel, 21000  
43  
44 19 Dijon, France

45  
46 20 <sup>g</sup> Université Bourgogne Franche Comté, UFR des Sciences Santé, 7, bd Jeanne d’Arc, 21000 Dijon,  
47  
48 21 France

49  
50  
51 22 *Emails*

52  
53  
54 23 Noémie Roland [noemie.roland@assurance-maladie.fr](mailto:noemie.roland@assurance-maladie.fr)  
55  
56  
57

1  
2  
3 24 Noëlla Delmas [noella.delmas@gmail.com](mailto:noella.delmas@gmail.com)  
4

5 25 Fabienne El Khoury [fabienne.khoury@inserm.fr](mailto:fabienne.khoury@inserm.fr)  
6

7 26 Alice Bardou [alice-bardou@live.com](mailto:alice-bardou@live.com)  
8

9  
10 27 Leila Yacini [leila.yacini@gmail.com](mailto:leila.yacini@gmail.com)  
11

12 28 Laure Feldmann [laure.feldmann@yahoo.fr](mailto:laure.feldmann@yahoo.fr)  
13

14 29 Ghada Hatem [ghada.hatem@ch-stdenis.fr](mailto:ghada.hatem@ch-stdenis.fr)  
15

16 30 Sarah Mahdjoub [sarah.mahdjoub@inserm.fr](mailto:sarah.mahdjoub@inserm.fr)  
17

18 31 Marc Bardou [marc.bardou@u-bourgogne.fr](mailto:marc.bardou@u-bourgogne.fr)  
19  
20  
21  
22  
23

24 33 \*Noémie Roland and Noëlla Delmas contributed equally to this article  
25

26 34 ✉ **Correspondence** to Noemie Roland, La Maison des femmes, 1 Chemin du Moulin Basset, 93200  
27

28 35 Saint-Denis, France; E-mail: [noemie.roland@assurance-maladie.fr](mailto:noemie.roland@assurance-maladie.fr)  
29  
30  
31  
32

33 37 **Acknowledgements:**  
34

35 38 We thank the women who agreed to participate in the study and the staff who ran the interviews  
36  
37  
38 39 with the women.  
39  
40  
41  
42  
43  
44  
45  
46  
47  
48  
49  
50  
51  
52  
53  
54  
55  
56  
57  
58  
59  
60

## 41 Abstract

42 **Objectives:** To examine the prevalence of Post-Traumatic Stress Disorder (PTSD) in victims-  
43 survivors of Intimate Partner Violence (IPV) consulting at the specialized and original facility  
44 “Maison des Femmes” (MdF) or in two close Municipal Health Centres (MHCs).

45 **Design:** A mixed-methods study using a convergent parallel design from July 2020 to June 2021.

46 **Setting/participants:** A questionnaire was proposed to women aged 18 years and over having  
47 suffered from IPV, in the MdF and in two MHCs. We also conducted qualitative interviews with a  
48 sub-sample of the women, asking for victim-survivors’ perceptions of the effect of the MdF’s care.

49 **Primary and secondary outcome measures:** Presence of a PTSD using the PTSD self-report  
50 checklist of symptoms (PCL-5), possibility of reaching women by phone 6 months after the  
51 inclusion visit, level of self-rated global health, number of emergency visits in the past 6 months,  
52 substances use, readiness to change and safety behaviours.

53 **Results:** A total of 67 women (mean age: 34 years [SD=9.7]) responded to our questionnaire.  
54 PTSD diagnosis was retained for 40 women (59.7%). Around 30% of participants self-rated their  
55 global health as bad. Less than 30% (n=18) of women were regular smokers, and only 7.5% of  
56 participants had a problematic alcohol use (Audit-C score  $\geq 4$ ), 19.4% women used psychotropic  
57 drugs. Six months after inclusion, a half of participants had been reached by phone. Analysis of the  
58 qualitative interviews clarified victim-survivors’ perceptions of the MdF’s specific care: social  
59 networking, multidisciplinary approach, specialized listening, healthcare facilities, evasion and  
60 “feeling at home”.

61 **Conclusions:** The high prevalence of PTSD at inclusion was nearly the same between the three  
62 centres. This mixed-methods comparison will serve as a pilot study for a larger comparative trial  
63 to assess the long-term impact of the MdF’s specialized care on victims-survivors’ mental health,  
64 compared with the care of uncoordinated structures.

1  
2  
3 65 **Trial registration number:** NCT04304469  
4

5 66  
6

---

7  
8 67 **STRENGTHS AND LIMITATIONS OF THIS STUDY**  
9

- 
- 10 - This is the first study to assess the prevalence of post-traumatic stress disorder (PTSD)  
11 among victim-survivors of intimate partner violence attending France's first facility  
12 dedicated to the treatment of violence against women: the *Maison Des Femmes* (MdF).  
13  
14
  - 15 - The study has the advantage of combining quantitative and qualitative methods to consider  
16 the possibility of a larger-scale trial.  
17
  - 18 - We were able to consider women in situations of violence and precariousness who are  
19 difficult to interview in practice (safety, confidentiality, shame, etc.).  
20
  - 21 - However, this study lacks information on other traumatic events experienced by the  
22 respondents and on the duration and/or repetition of the violence.  
23
  - 24 - Health outcomes measured in this study are based solely on the women's self-reported  
25 perceptions, rather than on possibly more valid clinical observations  
26  
27  
28  
29  
30  
31  
32  
33  
34
- 

35 68  
36  
37  
38 69 **Keywords:** Gender-based violence, Intimate Partner violence, Mental health, Interdisciplinary  
39 care  
40  
41  
42  
43  
44

45 72 **Funding:** The study was funded by crowd funding and promoted by the Dijon Bourgogne's  
46 Teaching hospital. Grant number: N/A  
47  
48

49 74  
50

51 75 **Ethics approval and consent to participate.**  
52  
53  
54  
55  
56  
57  
58  
59  
60

1  
2  
3 76 The Committee for the Protection of Persons of Ile de France 6 provided ethical approval for this  
4  
5 77 study (reference number 92-19 NI Cat.3, file number 19.12.10.36712).  
6

7  
8 78 Trained research assistants ask every participant for a written informed consent before recruitment.  
9

10 79

11  
12 80 **Availability of data and material.**  
13

14 81 The datasets generated and analysed during the current study are not publicly available due to their  
15  
16 82 containing information that could compromise the privacy/safety of research participants but are  
17  
18 83 available from the corresponding author on reasonable request.  
19  
20

21 84

22  
23  
24 85 **Author's disclosure:** The authors declare that they have no competing interests.  
25

26 86

27  
28 87 **Word Count:** 3117  
29  
30  
31  
32  
33  
34  
35  
36  
37  
38  
39  
40  
41  
42  
43  
44  
45  
46  
47  
48  
49  
50  
51  
52  
53  
54  
55  
56  
57  
58  
59  
60

## 89 **Introduction.**

90 According to the WHO, violence against Women (VaW) is a global public health matter with  
91 significant physical and mental health-related consequences for the victims [1]. Intimate partner  
92 violence (IPV) is the most widespread form of VaW [2]. Worldwide, around 30% of girls and  
93 women aged 15 and older have experienced IPV in their lifetime[3]. IPV are associated with an  
94 increased risk of developing numerous short and long-term adverse psychological outcomes,  
95 including depression, generalized anxiety disorder, and Post-Traumatic Stress Disorder (PTSD)  
96 [4], a psychiatric disorder that may occur in people who have experienced, or witnessed, a traumatic  
97 event [5].

98 Women who experienced violence have specific needs, arising from the often-repeated and  
99 complex nature of the trauma [6]. They also tend to accumulate other risk factors for poor mental  
100 health, such as economic insecurity, parenting stress and social isolation [7]. In France, victims-  
101 survivors of IPV, especially the most socially disadvantaged ones, face multiple barriers to  
102 healthcare access [8]. Particularly, there is a lack of dedicated care facilities and providers trained  
103 in caring for these women's specific medical, psychosocial, parenting and judicial needs. French  
104 Health professionals are strongly encouraged to ask their female patients about any experience of  
105 physical or sexual violence [9]. But they have rarely received the specific training to deal with  
106 these issues with confidence and professionalism, and often lack the resources to refer women  
107 victims of IPV to appropriate care facilities and health providers.

108 As described in a recent publication [10], « La Maison des Femmes » (MdF, Women's Home),  
109 established in 2016, is a medical and social structure specifically dedicated to provide  
110 individualized multidisciplinary care for victims-survivors of VaW, such as IPV. It offers care  
111 combining health, social and judicial aspects in a single structure. The MdF consists of 3 units: a

1  
2  
3 112 Family Planning Centre (FPC, consultations for contraception and abortions), a violence care unit  
4  
5 113 (composed of psychiatrist, general practitioners, midwives, psychologists, social workers, lawyers,  
6  
7 114 police officers, and support groups) and a female genital mutilation care unit (surgeons and sex  
8  
9 115 therapists). The MdF is located in the poorest department in mainland France, Seine-Saint-Denis,  
10  
11 116 a department right next to Paris, where one in four women attending the FPCs suffers, or has  
12  
13 117 suffered, from IPV [10].

14  
15  
16 118 Several structures providing coordinated multidisciplinary care, directly inspired by the model of  
17  
18 119 the Saint Denis women's centre, have been created in France. As the economic model has not yet  
19  
20 120 been established, the question arises of evaluating the service provided by these coordinated care  
21  
22 121 structures, particularly in terms of their capacity to improve the mental health and reduce the post-  
23  
24 122 traumatic stress of women victims of IPV.

25  
26  
27 123 The main objective of this study was to examine individual characteristics, and the prevalence of  
28  
29 124 PTSD, in victims-survivors of IPV consulting at the MdF or in two others Municipal Health Centres  
30  
31 125 located in the same area of the Paris conurbation.

32  
33  
34 126

## 35 36 37 127 **Methods**

### 38 39 128 *Data source and study population*

40  
41  
42 129 We carried out surveys from July 2020 to June 2021 in three Family Planning Centers (FPC): one  
43  
44 130 in the Mdf, and 2 in MHC from the same department (MHC-1 in Saint Denis, MHC-2 in  
45  
46 131 Aubervilliers).

47  
48  
49 132 All women aged 18 years and over consulting in one of the three FPCs, having suffered or suffering  
50  
51 133 from IPV and able to understand the objectives of the study were eligible (interpreters could be  
52  
53 134 contacted by phone if necessary). Trained research assistants (RA) were available in each of the  
54  
55 135 study centres to screen women for eligibility, explain the study, and ask for a written informed

1  
2  
3 136 consent before recruitment. Women under 18 years old or under tutorship were excluded. RA also  
4  
5 137 assisted participants in completing the questionnaire.  
6  
7  
8 138 We contacted each participant by telephone 6 months later.  
9

10 139  
11  
12 140 *Patient and public involvement*  
13  
14 141 For security and confidentiality reasons, it was not appropriate or possible to involve patients or  
15  
16 142 the public in the design, or conduct, or reporting, or dissemination plans of our research.  
17  
18  
19 143

20  
21 144 *Outcome measures*  
22

23 145 Data were collected using a self-administered questionnaire that included questions about  
24  
25 146 participants' socio-demographic characteristics, as well as a range of health and substance use data.  
26  
27 147 The main outcome was a PTSD diagnosis, measured using the PTSD self-report checklist of 20  
28  
29 148 PTSD symptoms defined in the DSM-5 (PCL-5) [11]. PCL-5 is a widely used self-administrated  
30  
31 149 questionnaire to detect and evaluate a PTSD, with a validated French version [12]. Each item on  
32  
33 150 this scale is rated on a five-point Likert scale reflecting severity of a particular symptom from 0  
34  
35 151 (not at all) to 4 (extremely) during the past month, with a threshold score of 33.  
36  
37 152 Other outcomes included: the possibility of reaching women by phone 6 months after the inclusion  
38  
39 153 visit, the level of self-rated global health (Likert scale: “Very good”, “Good”, “Quite good”, “Bad”,  
40  
41 154 “Very Bad”), the self-reported number of emergency visits in the past 6 months, the substances  
42  
43 155 use: smoking status, alcohol (evaluated by the Alcohol Use Disorders Identification Test-  
44  
45 156 Consumption/AUDIT-C [13]), drugs (“Did you use hypnotics, sleep pills, antidepressants or  
46  
47 157 anxiolytics in the past 6 months ?”), the readiness to change, the safety behaviors (evaluated by  
48  
49 158 questions inspired by the Safety behavior Checklist [14]) and the help seeking behaviors in the past  
50  
51 159 6 months (evaluated by questions inspired by Van Parys et al. [15]).  
52  
53  
54  
55  
56  
57  
58  
59  
60



1  
2  
3 1604  
5 161 *Qualitative interviews*

6  
7 162 We conducted semi-structured interviews with a sub-sample of the participants in the MdF and in  
8  
9 163 the MHC-1, according to the grounded theory (the interview guide is available in Supplementary  
10  
11 164 figure). The interviews were all conducted by the same researcher, a MD qualified in qualitative  
12  
13 165 research who used an interview guide. The interview guide was developed by the coauthors and  
14  
15 166 reviewed and tested by 2 psychologists and one social researcher to verify the comprehensibility  
16  
17 167 of the questions. The guide included questions about: history of violence, women's perception of  
18  
19 168 the effect of the care provided at MdF and in the MHCs, women's perception of their needs and  
20  
21 169 their mental and physical health. Interviews were anonymized, transcribed, analyzed and  
22  
23 170 interpreted following practical guidance for conducting qualitative research [16].  
24  
25  
26  
27

28 171

29  
30 172 *Ethics*

31  
32 173 The Committee for the Protection of Persons of Ile de France 6 provided ethical approval for this  
33  
34 174 study (reference number 92-19 NI Cat.3, file number 19.12.10.36712). As recommended by the  
35  
36 175 WHO, our study paid particular attention to minimizing the risk affecting the safety of the  
37  
38 176 respondents: confidentiality, safe climate at all time, informed consent, and basic care and support  
39  
40 177 available locally for victims-survivors [17].  
41  
42  
43  
44

45 178

46  
47 179 *Analysis*

48  
49 180 This mixed-method study used a convergent parallel design [18]. Quantitative data analysis was  
50  
51 181 conducted using SAS for Windows (version 9.4). To describe the socio-demographic  
52  
53 182 characteristics, perceived social support, health and substance use indicators descriptive statistics  
54  
55 183 was used consisting of frequency, percentage, and mean and standard deviation.  
56  
57  
58  
59

1  
2  
3 184 As concerned the qualitative interviews, we conducted an inductive content analysis using a  
4  
5 185 grounded theory approach [19]. The qualitative data were analysed with NVivo V12 software. The  
6  
7 186 transcribed text was coded, then the codes were sorted into categories and main themes, and were  
8  
9 187 illustrated using verbatim quotations. We used a checklist of quality criteria (i.e. credibility,  
10  
11 188 dependability, conformability, transferability, and authenticity) to improve the trustworthiness of  
12  
13 189 our results [19].  
14  
15  
16  
17  
18

## 19 191 **Results**

### 20 192 *Sample description*

21  
22 193 A total of 67 women responded to our questionnaire: 40 in the MdF, 12 in the MHC-1 and 15 in  
23  
24 194 the MHC-2.

25  
26 195 The characteristics of study participants are described in Table 1 (more detailed characteristics are  
27  
28 196 described in Supplementary-table 1). Majority of the participants (57%) were aged below 35 years,  
29  
30 197 with a mean age of 34 [SD=9.7], and had at least one child (73.1%). Slightly more than half of  
31  
32 198 participants (53.0%) were not born in France. Around 25% of participants (n=17) declared having  
33  
34 199 no one to turn to for help or assistance if they needed it, while more than one third (n=25) had at  
35  
36 200 least two people to turn to for help.  
37  
38  
39

40  
41 201 Six months after inclusion, a half of participants (52.2%) had been reached by phone (65.0% in  
42  
43 202 MdF, 25.0% in MHC-1 and 40.0% in MHC-2).  
44  
45  
46

### 47 203 *Prevalence of PTSD*

48  
49 204 Participants reported an average PCL-5 score of 37.1 (SD = 16.6) (Table 2). Forty women (59.7%)  
50  
51 205 had a PCL-5 score of at least 33, which is the accepted cut-off value for defining the presence of  
52  
53 206 PTSD diagnosis (table 2). The prevalence of PTSD was quite similar between the three groups.  
54  
55 207  
56  
57  
58  
59  
60

1  
2  
3 208  
4  
5 209 *Health and substance use outcomes*  
6  
7  
8 210 Around 40% of participants (n=26) self-rated their global health as a good or very good. The same  
9  
10 211 percentage of participants reported consulting at an emergency room in the past 6 months.  
11  
12 212 Less than 30% (n=18) of women were regular smokers, and only 7.5% of participants had a  
13  
14 213 problematic alcohol use with an Audit-C score greater than or equal to 4, one out of five women  
15  
16 214 used psychotropic drugs.  
17  
18  
19 215

20  
21 216 *Qualitative data*  
22

23  
24 217 For this pilot study, nine women have been interviewed (6 in the MdF, 3 in the MHC-1)  
25  
26 218 (supplementary table 2).  
27

28 219 They were aged 27 to 55 years old (mean age: 38.8), six were employed. Seven women had at least  
29  
30 220 one child. Only one was in a couple, and they have suffered from domestic violence between 1.5  
31  
32 221 and 13 years (mean: 5.4 years).  
33  
34

35 222 With regard to the perception of difficulties encountered by the women victims of violence, four  
36  
37 223 main themes emerged from the thematic analysis: a feeling of loneliness, the need to be listened  
38  
39 224 to, the specificity of the symptoms of the victims-survivors, and the difficulties in accessing  
40  
41 225 healthcare (Figure 1).  
42  
43

44 226 “I spend all day long alone like this, with my thoughts, I don’t know where to go, and I’m still  
45  
46 227 turning in circles...” (MHC1)  
47  
48

49 228 “In fact I think we should be in a bubble with psychologists all the time [laughs] to be listened and  
50  
51 229 to feel that we’re not alone.” (MHC2)  
52  
53

54 230 “We need real professionals, who understand what we’re going through” (MdF5)  
55  
56  
57  
58  
59  
60

1  
2  
3 231 “I wanted to go to another support group but I’ve been told that I have to wait because there are  
4  
5 232 too many people... I cried not because there was no room for me but because we are so many, and  
6  
7 233 there is no room for anyone...” (MdF3)

8  
9  
10 234 With regards to the perception of the specific care of the MdF, six main themes emerged. Four of  
11  
12 235 them correspond to the four themes developed in figure 1: social networking, multidisciplinary  
13  
14 236 approach, specialized listening, healthcare facilities, and the other two themes highlight additional  
15  
16 237 advantages provided by the MdF: evasion, and “feeling at home” (figure 2).

17  
18  
19 238 “We live in a society where we are forced to believe that women are our competitors... But here  
20  
21 239 we are sisters.” (MdF5)

22  
23  
24 240 “That’s what interested me here, being able to get out of my head and to concentrate on a physical  
25  
26 241 activity [...] it makes it possible to find an appeasement, what I call a “air bubble” so I can restart”  
27  
28 242 (MdF4)

29  
30  
31 243 “I’m in a house here, it’s a house that is made for us [...]. There’s a roof like a house, I mean it’s  
32  
33 244 friendly, at first I said to myself “what am I doing here?” [...] and finally every time I come I can  
34  
35 245 say everything, I feel like it won’t come out the walls, I feel like whatever I say I won’t be judged”.  
36  
37 246 (MdF6).

38  
39  
40 247

41  
42 248  
43  
44  
45  
46  
47  
48  
49  
50  
51  
52  
53  
54  
55  
56  
57  
58  
59  
60

## 249 **Discussion**

250 This study highlights the very substantial (60%) prevalence of PTSD symptoms in a sample of  
251 women who have experienced IPV and consulting at Family Planning Centers in the Parisian  
252 region.

253 Our results have showed that the proportion of women suffering from PTSD is not different  
254 according to the care structure and have outlined the recruitment capacity for a future larger study.

### 256 *Prevalence of PTSD*

257 These results are consistent with those reported by other authors who have described an association  
258 between the exposure to IPV and the presence of PTSD [20,21]. The prevalence of PTSD among  
259 victims-survivors of IPV varies depending on the studies and on the tool used to quantify PTSD,  
260 ranging from 33 to 84%, with a mean of 61% [22].

261 To assess the benefit of a multidisciplinary and cooperated approach on the mental health of the  
262 victims-survivors, as the MdF provides, a comparison between the three centres a few months after  
263 the inclusion with a repeated measure of PTSD would be advisable. The fact that the prevalence of  
264 PTSD at inclusion is almost the same between the three centres in our study seems to eliminate  
265 centre bias, and encourages us to consider a larger comparative study aimed at comparing the long-  
266 term impact of the MdF on the mental health of victim-survivors with that of standard-of-care  
267 structures. This study, the IROND-L study, has just been funded by the French Ministry for Health,  
268 submitted to an ethic committee and is likely to start early in 2024. We were unable to contact a  
269 majority of women from the MHCs six months after inclusion, whereas two out of three women  
270 from the MdF had been reached. This could reinforce the fact that women may value the care  
271 provided by the MdF more than that provided by non-dedicated structures, but it will present an  
272 additional difficulty for a subsequent comparative study.

1  
2  
3 273 *A multicomponent model*  
4

5 274 The MdF is a structure that provides multicomponent trauma-informed and holistic care. Getting  
6  
7  
8 275 out of IPV is a process with multiple stages [23]. Our qualitative results reinforce the fact that MdF  
9  
10 276 seems to fit to the needs of the victims-survivors throughout their trajectory. MdF supplies essential  
11  
12 277 interventions recommended by the WHO to prevent VaW [24]. These interventions correspond to  
13  
14 278 models presented as highly efficient to improve the mental health of IPV survivors [25]. On the  
15  
16  
17 279 top of that, respondents also described the MdF as a warm place where they could escape from  
18  
19 280 reality, a new concept that needs to be explored in the future.  
20

21  
22 281

23  
24 282 **Perspectives**  
25

26 283 This study will serve as a basis for a larger comparative trial of the long-term impact of specialized  
27  
28 284 care of the MdF on PTSD compared to the care in non-specialized structures: the “IROND-L”  
29  
30 285 study (“*Evaluation of the impact of the care of women victims of sexist and sexual violence,*  
31  
32 286 *according to a coordinated multidisciplinary approach in women's homes or traditional health*  
33  
34 287 *centres or family planning, on mental and physical health: a prospective, quasi-experimental,*  
35  
36 288 *multicentre, national study*”). We are planning a quantitative and a qualitative component, as well  
37  
38 289 as a medico economic study. The main objective aims to assess the evolution of PTSD between the  
39  
40 290 initial visit and 6 months later in women victims-survivors of violence, according to whether they  
41  
42 291 are treated in structures offering a coordinated multidisciplinary approach (MdF), or in health  
43  
44 292 centres or family planning. We also aim to assess the presence of sleep disorders, the quality of  
45  
46 293 life, the presence of depressive and anxiety symptoms substances use, the reason for seeking care,  
47  
48 294 and the women’s perception of their safety and well-being and that of their children.  
49  
50

51  
52  
53 295 In the pilot study, the mean PCL-5 score was = 37.1 (sd= 16.6). Therefore, a minimum of 150  
54  
55 296 women per group is required to achieve a power of 80% and 5% significance level (two-sided), to  
56  
57

1  
2  
3 297 detect a mean difference of 5.5 between the two groups, assuming that the standard deviation of  
4  
5 298 the differences is 17 (Figure 2). Thus, 180 women per group will need to be recruited to account  
6  
7 299 for a potential 35% rate of loss to follow-up. The IROND-L study will include 360 women victims  
8  
9 300 of violence and will be conducted in five metropolitan department, and we hope it will increase  
10  
11 301 generalisability of the results. However, generalisability may not be transposable as the MdF  
12  
13 302 approach is new and quite unique worldwide.  
14  
15

16  
17 303 Lastly, the future qualitative component will also require much greater recruitment to interview  
18  
19 304 more profiles that are different and approach data saturation, which this pilot study could not  
20  
21 305 achieve.  
22  
23

24 306

### 25 307 **Strengths and limitations**

26  
27  
28 308 This is the first French study assessing the prevalence of PTSD in victims-survivors of IPV in  
29  
30 309 MHCs and the MdF, being the first French structure dedicated to the care of women victims of  
31  
32 310 violence. The high prevalence of PTSD outlined in our study justifies the need for launching larger  
33  
34 311 quantitative and qualitative researches on the mental health of the victims.  
35  
36

37 312 However, this study has several limitations. Firstly, it was conducted in health facilities and  
38  
39 313 therefore does not include women in IPV situations who do not have access to healthcare or those  
40  
41 314 who face significant barriers to seeking care. Nevertheless, we do not believe that our population  
42  
43 315 is biased towards more advantaged women. Indeed, even though limited, our sample embraces a  
44  
45 316 wide range of situations, with 53% of women born outside of France, 37% having social security  
46  
47 317 coverage reserved for those with no or low income from work or illegal immigrant status,  
48  
49 318 suggesting that the facilities where the study was conducted have a broad recruitment base.  
50  
51

52  
53 319 Even if we have no formal explanation for the low follow-up rate, financial difficulties have been  
54  
55 320 described as an important factor in the loss to follow-up [26]. As our study took place in the poorest  
56  
57

1  
2  
3 321 area in France, we had anticipated, but without fair estimate, that the follow-up rate would be low.  
4  
5 322 It was indeed one of our objectives to provide data to design the IROND-L study.  
6  
7 323 It is known, and we have shown [10] that violent episodes occur more frequently during a break-  
8  
9  
10 324 up phase (separation, job search) and that women who are victims of violence are therefore  
11  
12 325 logically more likely to move house or change their telephone number in order to escape their  
13  
14 326 violent partner. It is therefore logical that these women are more difficult to monitor.  
15  
16  
17 327 Moreover, we decided to focus on domestic violence in this pilot study, and did not collect data on  
18  
19 328 other stressful or traumatic events. Only the qualitative part of this study explored the duration  
20  
21 329 and/or repetition of the violence and/or the duration since the possible end of the violence. This  
22  
23 330 information will have to be considered and collected in the future quantitative and qualitative  
24  
25 331 questionnaires of the larger IROND-L comparative study.  
26  
27  
28 332 Finally, the health outcomes measured in this study are based solely on women's self-reported  
29  
30 333 perceptions, rather than on potentially more valid clinical observations. These limitations will be  
31  
32 334 addressed in the future comparative study using a quasi-experimental design, where care pathways  
33  
34 335 and the consumption of medical goods and services, will be assessed based on medical records and  
35  
36 336 health insurance database.  
37  
38  
39

40 337  
41  
42 338 **Conclusions**  
43  
44 339 Given the links between violence and women's mental health found in this study, recommendations  
45  
46 340 to encourage clinicians to inquire about their patients' experiences of violence should be  
47  
48 341 maintained. However, health care providers also need to be properly trained and informed to refer  
49  
50 342 identified violence victims to appropriate adequate and trauma informed care. The future IROND-L  
51  
52 343 study needs to assess the effect of coordinated interventions such as the ones offered at MdF on  
53  
54 344 women's mental health. This future study is of particular importance as the MDF model is to be  
55  
56  
57  
58  
59  
60



1  
2  
3 345 duplicated throughout France, at the request of the French government [27], and is part of an overall  
4  
5 346 French national public health policy for the care of victims of violence.  
6  
7

8 347

9  
10 348 **Author's statement**

11  
12 349 Noémie Roland (NR), Marc Bardou (MB) and Fabienne El-Khoury (FE-K) conceived, planned,  
13  
14 350 and designed the study. Ghada Hatem (GH), Alice Bardou (AB), Leila Yacini (LY) and Laura  
15  
16 351 Feldmann (LF) collected the questionnaires and collated the data. Noëlla Delmas (ND), Sarah  
17  
18 352 Mahdjoub (SM) and FE-K performed the data management. ND, SM and FE-K performed the  
19  
20 353 statistical analyses. NR, ND, SM and FE-K interpreted the data. NR draft the manuscript. MB and  
21  
22 354 GH ensured project and study management. All authors reviewed and approved the final  
23  
24 355 manuscript. The corresponding author (NR) attests that all listed authors meet the authorship  
25  
26 356 criteria and that no others meeting the criteria have been omitted. MB is the guarantor.  
27  
28  
29 357 Each author has confirmed compliance with the journal's requirements for authorship.  
30  
31  
32

33 358

34  
35 359  
36  
37  
38  
39  
40  
41  
42  
43  
44  
45  
46  
47  
48  
49  
50  
51  
52  
53  
54  
55  
56  
57  
58  
59  
60

360 **References**

- 361 1 World Health Organization. Violence against women: a ‘global health problem of epidemic  
362 proportions.’ 2013. [https://www.who.int/news/item/20-06-2013-violence-against-women-a-](https://www.who.int/news/item/20-06-2013-violence-against-women-a-global-health-problem-of-epidemic-proportions-)  
363 [global-health-problem-of-epidemic-proportions-](https://www.who.int/news/item/20-06-2013-violence-against-women-a-global-health-problem-of-epidemic-proportions-) (accessed 23 February 2023)
- 364 2 World Health Organization. Violence against women prevalence estimates, 2018: global,  
365 regional and national prevalence estimates for intimate partner violence against women and  
366 global and regional prevalence estimates for non-partner sexual violence against women.  
367 2021.
- 368 3 Sardinha L, Maheu-Giroux M, Stöckl H, *et al.* Global, regional, and national prevalence  
369 estimates of physical or sexual, or both, intimate partner violence against women in 2018.  
370 *The Lancet.* 2022;0. doi: 10.1016/S0140-6736(21)02664-7
- 371 4 Trevillion K, Corker E, Capron LE, *et al.* Improving mental health service responses to  
372 domestic violence and abuse. *Int Rev Psychiatry.* 2016;28:423–32.
- 373 5 Scott KM, Koenen KC, King A, *et al.* Post-traumatic stress disorder associated with sexual  
374 assault among women in the WHO World Mental Health Surveys. *Psychol Med.*  
375 2018;48:155–67.
- 376 6 Ramsay J, Carter Y, Davidson L, *et al.* Advocacy interventions to reduce or eliminate  
377 violence and promote the physical and psychosocial well-being of women who experience  
378 intimate partner abuse. *Cochrane Database Syst Rev.* 2009;CD005043.
- 379 7 Breiding MJ, Basile KC, Klevens J, *et al.* Economic Insecurity and Intimate Partner and  
380 Sexual Violence Victimization. *American Journal of Preventive Medicine.* 2017;53:457–64.
- 381 8 IGAS. La prise en charge à l’hôpital des femmes victimes de violence : éléments en vue  
382 d’une modélisation. <https://www.igas.gouv.fr/spip.php?article636> (accessed 13 December  
383 2021)
- 384 9 HAS. Repérage des femmes victimes de violences au sein du couple. Haute Autorité de  
385 Santé. 2020. [https://www.has-sante.fr/jcms/p\\_3104867/fr/reperage-des-femmes-victimes-de-](https://www.has-sante.fr/jcms/p_3104867/fr/reperage-des-femmes-victimes-de-violences-au-sein-du-couple)  
386 [violences-au-sein-du-couple](https://www.has-sante.fr/jcms/p_3104867/fr/reperage-des-femmes-victimes-de-violences-au-sein-du-couple) (accessed 16 September 2021)
- 387 10 Roland N, Ahogbehossou Y, Hatem G, *et al.* Violence against women and perceived health:  
388 An observational survey of patients treated in the multidisciplinary structure “The Women’s  
389 House” and two Family Planning Centres in the metropolitan Paris area. *Health Soc Care*  
390 *Community.* Published Online First: 22 March 2022. doi: 10.1111/hsc.13797
- 391 11 Blevins CA, Weathers FW, Davis MT, *et al.* The Posttraumatic Stress Disorder Checklist for  
392 DSM-5 (PCL-5): Development and Initial Psychometric Evaluation. *J Trauma Stress.*  
393 2015;28:489–98.

- 1  
2  
3 394 12 Ashbaugh AR, Houle-Johnson S, Herbert C, *et al.* Psychometric Validation of the English  
4 395 and French Versions of the Posttraumatic Stress Disorder Checklist for DSM-5 (PCL-5).  
5 396 *PLoS One.* 2016;11:e0161645.
- 7 397 13 Bush K, Kivlahan DR, McDonell MB, *et al.* The AUDIT alcohol consumption questions  
8 398 (AUDIT-C): an effective brief screening test for problem drinking. Ambulatory Care Quality  
9 399 Improvement Project (ACQUIP). Alcohol Use Disorders Identification Test. *Arch Intern*  
10 400 *Med.* 1998;158:1789–95.
- 13 401 14 McFarlane JM, Groff JY, O’Brien JA, *et al.* Secondary prevention of intimate partner  
14 402 violence: a randomized controlled trial. *Nurs Res.* 2006;55:52–61. doi: 10.1097/00006199-  
15 403 200601000-00007
- 17 404 15 Van Parys A-S, Deschepper E, Roelens K, *et al.* The impact of a referral card-based  
18 405 intervention on intimate partner violence, psychosocial health, help-seeking and safety  
19 406 behaviour during pregnancy and postpartum: a randomized controlled trial. *BMC Pregnancy*  
20 407 *Childbirth.* 2017;17:346. doi: 10.1186/s12884-017-1519-x
- 23 408 16 Moser A, Korstjens I. Series: Practical guidance to qualitative research. Part 1: Introduction.  
24 409 *European Journal of General Practice.* 2017;23:271–3.
- 26 410 17 World Health Organization. WHO Ethical and safety recommendations for researching,  
27 411 documenting and monitoring sexual violence in emergencies. 2007.  
28 412 <https://www.who.int/publications/i/item/9789241595681> (accessed 28 July 2022)
- 31 413 18 Creswell JW, Clark VLP. *Designing and Conducting Mixed Methods Research.* SAGE  
32 414 Publications 2017.
- 34 415 19 Kyngäs H, Kääriäinen M, Elo S. The Trustworthiness of Content Analysis. In: Kyngäs H,  
35 416 Mikkonen K, Kääriäinen M, eds. *The Application of Content Analysis in Nursing Science*  
36 417 *Research.* Cham: Springer International Publishing 2020:41–8. [https://doi.org/10.1007/978-](https://doi.org/10.1007/978-3-030-30199-6_5)  
37 418 [3-030-30199-6\\_5](https://doi.org/10.1007/978-3-030-30199-6_5)
- 39 419 20 Pill N, Day A, Mildred H. Trauma responses to intimate partner violence: A review of  
40 420 current knowledge. *Aggression and Violent Behavior.* 2017;34:178–84.
- 43 421 21 Pemberton JV, Loeb TB. Impact of Sexual and Interpersonal Violence and Trauma on  
44 422 Women: Trauma-Informed Practice and Feminist Theory. *Journal of Feminist Family*  
45 423 *Therapy.* 2020;32:115–31.
- 47 424 22 Woods S. Prevalence and Patterns of Posttraumatic Stress Disorder in Abused and  
48 425 Postabused Women. *Issues in Mental Health Nursing.* 2000;21:309–24.
- 51 426 23 Dziewa A, Glowacz F. “Getting out from Intimate Partner Violence: Dynamics and  
52 427 Processes. A Qualitative Analysis of Female and Male Victims’ Narratives”. *J Fam Violence.*  
53 428 2022;37:643–56.

- 1  
2  
3 429 24 World Health Organization. RESPECT women: Preventing violence against women. 2019.  
4 430 [https://apps-who-int.proxy.insermbiblio.inist.fr/iris/bitstream/handle/10665/312261/WHO-](https://apps-who-int.proxy.insermbiblio.inist.fr/iris/bitstream/handle/10665/312261/WHO-RHR-18.19-eng.pdf?ua=1)  
5 431 [RHR-18.19-eng.pdf?ua=1](https://apps-who-int.proxy.insermbiblio.inist.fr/iris/bitstream/handle/10665/312261/WHO-RHR-18.19-eng.pdf?ua=1) (accessed 28 July 2022)  
6  
7 432 25 Paphitis SA, Bentley A, Asher L, *et al.* Improving the mental health of women intimate  
8 433 partner violence survivors: Findings from a realist review of psychosocial interventions.  
9 434 *PLOS ONE*. 2022;17:e0264845.  
10  
11  
12 435 26 Tong CYM, Koh RYV, Lee ES. A scoping review on the factors associated with the lost to  
13 436 follow-up (LTFU) amongst patients with chronic disease in ambulatory care of high-income  
14 437 countries (HIC). *BMC Health Services Research*. 2023;23:883.  
15  
16 438 27 French Government. Présentation du plan interministériel pour l'égalité entre les femmes et  
17 439 les hommes 2023-2027/Presentation of the interministerial plan for equality between women  
18 440 and men 2023-2027. 2023. [https://www.gouvernement.fr/communique/presentation-du-plan-](https://www.gouvernement.fr/communique/presentation-du-plan-interministeriel-pour-egalite-entre-les-femmes-et-les-hommes-2023-2027)  
19 441 [interministeriel-pour-egalite-entre-les-femmes-et-les-hommes-2023-2027](https://www.gouvernement.fr/communique/presentation-du-plan-interministeriel-pour-egalite-entre-les-femmes-et-les-hommes-2023-2027)  
20  
21  
22 442  
23  
24 443  
25  
26  
27  
28  
29  
30  
31  
32  
33  
34  
35  
36  
37  
38  
39  
40  
41  
42  
43  
44  
45  
46  
47  
48  
49  
50  
51  
52  
53  
54  
55  
56  
57  
58  
59  
60

## 444 TABLES

445 Table 1: Sociodemographic characteristics of study participants (n=67)

|                                                                              | ALL<br>N=67<br>% (n) | Maison<br>des<br>Femmes<br>N=40<br>% (n) | MHC-1<br>N=12<br>% (n) | MHC-2<br>N=15<br>% (n) |
|------------------------------------------------------------------------------|----------------------|------------------------------------------|------------------------|------------------------|
| <b>Age (years) (n=67)</b>                                                    |                      |                                          |                        |                        |
| Mean [SD, range]                                                             | 34.1 [9.7, 18-71]    | 31.3 [8.2, 18-71]                        | 40.3 [8.7, 29-55]      | 36.5 [10.0, 21-52]     |
| Median                                                                       | 33                   | 29                                       | 37                     | 37                     |
| <b>Ages (years, 4 classes)</b>                                               |                      |                                          |                        |                        |
| 18-24                                                                        | 14.9 (10)            | 20.0 (8)                                 | 0 (0)                  | 13.3 (2)               |
| 25-34                                                                        | 41.8 (28)            | 52.5 (21)                                | 25.0 (3)               | 26.7 (4)               |
| 35-49                                                                        | 34.3 (23)            | 25.0 (10)                                | 50.0 (6)               | 46.7 (7)               |
| ≥50                                                                          | 9.0 (6)              | 2.5 (1)                                  | 25.0 (3)               | 13.3 (2)               |
| <b>In a couple (n=67)</b>                                                    |                      |                                          |                        |                        |
| Yes                                                                          | 49.2 (33)            | 50.0 (20)                                | 50.0 (6)               | 46.7 (7)               |
| <b>Has children (n=67)</b>                                                   |                      |                                          |                        |                        |
| Yes                                                                          | 73.1 (49)            | 67.5 (27)                                | 83.3 (10)              | 80.0 (12)              |
| <b>Born in France (n=66)</b>                                                 |                      |                                          |                        |                        |
| Yes                                                                          | 47.0 (31)            | 43.6 (17)                                | 50.0 (6)               | 53.3 (8)               |
| <b>Health coverage (n=67)</b>                                                |                      |                                          |                        |                        |
| Health insurance                                                             | 44.8 (30)            | 37.5 (15)                                | 66.7 (8)               | 46.7 (7)               |
| Social security                                                              | 17.9 (12)            | 22.5 (9)                                 | 0 (0)                  | 20.0 (3)               |
| Universal Health Coverage (CMU)                                              | 25.4 (17)            | 30.0 (12)                                | 16.7 (2)               | 20.0 (3)               |
| State medical assistance (AME)                                               | 4.5 (3)              | 0 (0)                                    | 16.7 (2)               | 6.7 (1)                |
| No coverage                                                                  | 7.5 (5)              | 10.0 (4)                                 | 0 (0)                  | 6.7 (1)                |
| <b>Professional situation (n=66)</b>                                         |                      |                                          |                        |                        |
| Inactive                                                                     | 39.4 (26)            | 38.5 (15)                                | 16.7 (2)               | 60.0 (9)               |
| Unemployed                                                                   | 13.6 (9)             | 10.3 (4)                                 | 25.0 (3)               | 13.3 (2)               |
| Working                                                                      | 37.9 (25)            | 38.5 (15)                                | 58.3 (7)               | 20.0 (3)               |
| Student                                                                      | 9.1 (6)              | 12.8 (5)                                 | 0 (0)                  | 6.7 (1)                |
| <b>Support (n=67)</b>                                                        |                      |                                          |                        |                        |
| No one                                                                       | 25.4 (17)            | 22.5 (9)                                 | 33.3 (4)               | 26.7 (4)               |
| One people                                                                   | 37.3 (25)            | 45.0 (18)                                | 25.0 (3)               | 26.7 (4)               |
| At least 2 peoples                                                           | 37.3 (25)            | 32.5 (13)                                | 41.7 (5)               | 46.7 (7)               |
| <b>Number of women that can be reached by phone 6 months after inclusion</b> |                      |                                          |                        |                        |
|                                                                              | 52.2 (35)            | 65.0 (26)                                | 25.0 (3)               | 40.0 (6)               |
| <b>Safety precaution (n=67)</b>                                              |                      |                                          |                        |                        |
| 1                                                                            | 3.0 (2)              | 2.5 (1)                                  | 8.3 (1)                | 0 (0)                  |
| 2                                                                            | 10.6 (7)             | 10.0 (4)                                 | 8.3 (1)                | 14.3 (2)               |
| 3                                                                            | 19.7 (13)            | 17.5 (7)                                 | 25.0 (3)               | 21.4 (3)               |
| 4 (None)                                                                     | 66.7 (44)            | 70.0 (28)                                | 58.3 (7)               | 64.3 (9)               |
| <b>Willingness to change (n=67)</b>                                          |                      |                                          |                        |                        |
| 0 (None)                                                                     | 26.9 (18)            | 27.5 (11)                                | 25.0 (3)               | 26.7 (4)               |
| 1                                                                            | 23.9 (16)            | 27.5 (11)                                | 25.0 (3)               | 13.3 (2)               |
| 2                                                                            | 49.3 (33)            | 45.0 (18)                                | 50.0 (6)               | 60.0 (9)               |
| <b>Help seeking (n=67)</b>                                                   |                      |                                          |                        |                        |
| 0 (None)                                                                     | 10.5 (7)             | 17.5 (7)                                 | 0 (0)                  | 0 (0)                  |
| 1                                                                            | 22.4 (15)            | 20.0 (8)                                 | 16.7 (2)               | 33.3 (5)               |
| 2                                                                            | 19.4 (13)            | 20.0 (8)                                 | 33.3 (4)               | 6.7 (1)                |

|   |   |           |          |          |          |
|---|---|-----------|----------|----------|----------|
| 1 |   |           |          |          |          |
| 2 |   |           |          |          |          |
| 3 | 3 | 25.4 (17) | 22.5 (9) | 33.3 (4) | 26.7 (4) |
| 4 | 4 | 9.0 (6)   | 7.5 (3)  | 0 (0)    | 20.0 (3) |
| 5 | 5 | 6.0 (4)   | 5.0 (2)  | 16.7 (2) | 0 (0)    |
| 6 | 6 | 7.5 (5)   | 7.5 (3)  | 0 (0)    | 13.3 (2) |

446

447

For peer review only

448 Table 2: Medical characteristics of study participants (n=67)

449

|                                                         | <b>ALL</b>   | <b>Maison<br/>des Femmes</b> | <b>MHC-1</b> | <b>MHC-2</b> |
|---------------------------------------------------------|--------------|------------------------------|--------------|--------------|
|                                                         | <b>N=67</b>  | <b>N=40</b>                  | <b>N=12</b>  | <b>N=15</b>  |
|                                                         | <b>% (n)</b> | <b>% (n)</b>                 | <b>% (n)</b> | <b>% (n)</b> |
| <b>PCL-5</b>                                            |              |                              |              |              |
| Mean [SD]                                               | 37.1 [16.6]  | 37.7 [18.1]                  | 35.7 [13.7]  | 36.9 [15.6]  |
| Score $\geq$ 33                                         | 59.7 (40)    | 57.5 (23)                    | 60.0 (9)     | 66.7 (8)     |
| <b>Self-rated Global health</b>                         |              |                              |              |              |
| Very Bad                                                | 10.6 (7)     | 12.5 (5)                     | 9.0 (1)      | 6.7 (1)      |
| Bad                                                     | 23.3 (16)    | 20.0 (8)                     | 36.4 (4)     | 26.7 (4)     |
| Quite Good                                              | 25.8 (17)    | 25.0 (10)                    | 27.3 (3)     | 26.7 (4)     |
| Good                                                    | 31.8 (21)    | 35.0 (14)                    | 18.2 (2)     | 33.3 (5)     |
| Very Good                                               | 7.6 (5)      | 7.5 (3)                      | 9.0 (1)      | 6.7 (1)      |
| <b>Emergency Room visit(s) in<br/>the past 6 months</b> |              |                              |              |              |
| Yes                                                     | 40.3 (27)    | 47.5 (19)                    | 25.0 (3)     | 33.3 (5)     |
| <b>Active Smoker</b>                                    |              |                              |              |              |
| Yes                                                     | 26.9 (18)    | 27.5 (11)                    | 33.3 (5)     | 16.7 (2)     |
| <b>AUDIT-C<math>\geq</math>4</b>                        |              |                              |              |              |
| Yes                                                     | 7.5 (5)      | 10.0 (4)                     | 6.7 (1)      | 0            |
| <b>Use of Psychotropic Drugs</b>                        |              |                              |              |              |
| Yes                                                     | 19.4 (13)    | 20.0 (8)                     | 20.0 (3)     | 16.7 (2)     |

450

451

452

453 Figures legends

454 Figure 1: Perception of the difficulties encountered by the victims-survivors of violence

455 Figure 2: Perceptions of the specific care of the Maison des Femmes

456

1  
2  
3  
4  
5  
6  
7  
8  
9  
10  
11  
12  
13  
14  
15  
16  
17  
18  
19  
20  
21  
22  
23  
24  
25  
26  
27  
28  
29  
30  
31  
32  
33  
34  
35  
36  
37  
38  
39  
40  
41  
42  
43  
44  
45  
46  
47  
48  
49  
50  
51  
52  
53  
54  
55  
56  
57  
58  
59  
60

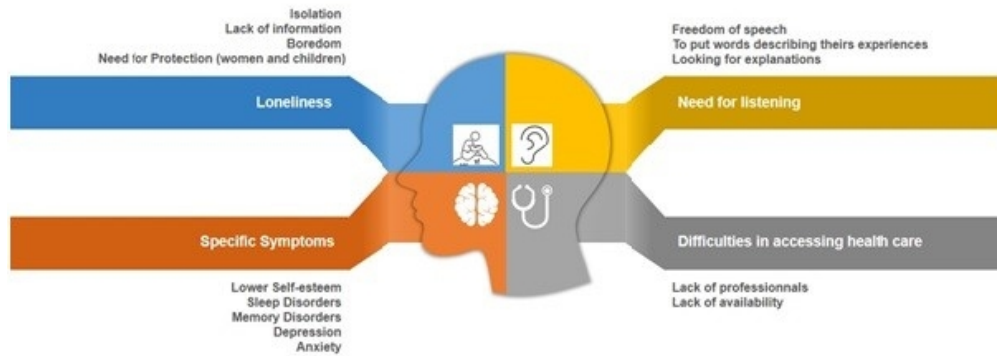

Perception of the difficulties encountered by the victims-survivors of violence

128x127mm (120 x 120 DPI)



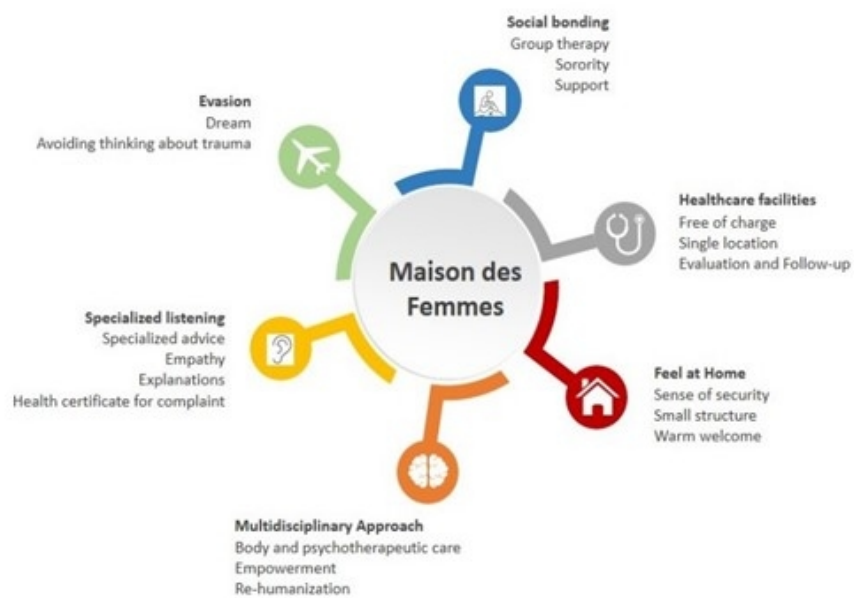

Perceptions of the specific care of the Maison des Femmes

119x119mm (120 x 120 DPI)

Supplementary Table 1: Detailed sociodemographic characteristics of study participants (n=67)

|                                                    | <b>ALL</b>        | <b>Maison des Femmes</b> | <b>MHC-1</b>      | <b>MHC-2</b>       |
|----------------------------------------------------|-------------------|--------------------------|-------------------|--------------------|
|                                                    | <b>N=67</b>       | <b>N=40</b>              | <b>N=12</b>       | <b>N=15</b>        |
|                                                    | <b>% (n)</b>      | <b>% (n)</b>             | <b>% (n)</b>      | <b>% (n)</b>       |
| <b>Age (years) (n=67)</b>                          |                   |                          |                   |                    |
| Mean [SD, range]                                   | 34.1 [9.7, 18-71] | 31.3 [8.2, 18-71]        | 40.3 [8.7, 29-55] | 36.5 [10.0, 21-52] |
| Median                                             | 33                | 29                       | 37                | 37                 |
| <b>In a couple for (n=32)</b>                      |                   |                          |                   |                    |
| Less than a year                                   | 25.0 (8)          | 10.0 (4)                 | 20.0 (1)          | 42.8 (3)           |
| 1-5 years                                          | 37.5 (12)         | 20.0 (8)                 | 40.0 (2)          | 28.6 (2)           |
| 6-15 years                                         | 28.1 (9)          | 15.0 (6)                 | 40.0 (2)          | 14.3 (1)           |
| >15 years                                          | 9.4 (3)           | 5.0 (2)                  | 0 (0)             | 14.3 (1)           |
| <b>Housing situation (n=66)</b>                    |                   |                          |                   |                    |
| Lives alone (tenant or owner of the house)         | 51.5 (34)         | 51.3 (20)                | 58.3 (7)          | 46.7 (7)           |
| Lives with (ex)spouse (tenant or owner)            | 13.6 (9)          | 18.0 (7)                 | 0 (0)             | 13.3 (2)           |
| (Ex)spouse alone (tenant or owner of the dwelling) | 1.5 (1)           | 0 (0)                    | 0 (0)             | 6.7 (1)            |
| Staying with family/friends                        | 24.2 (16)         | 20.5 (8)                 | 33.3 (4)          | 26.7 (4)           |
| Staying in a hostel                                | 9.1 (6)           | 10.3 (4)                 | 8.3 (1)           | 6.7 (1)            |
| <b>Geographic origin (n=62)</b>                    |                   |                          |                   |                    |
| North Africa                                       | 24.2 (15)         | 21.1 (8)                 | 25.0 (3)          | 33.3 (4)           |
| Sub-Saharan Africa                                 | 43.5 (27)         | 52.6 (20)                | 33.3 (4)          | 25.0 (3)           |
| Caribbean/Americas                                 | 8.1 (5)           | 10.5 (4)                 | 8.3 (1)           | 0 (0)              |
| Asia/Middle East                                   | 3.2 (2)           | 0 (0)                    | (0)               | 16.7 (2)           |
| Europe outside France                              | 4.8 (3)           | 5.3 (2)                  | (0)               | 8.3 (1)            |
| France                                             | 16.1 (10)         | 10.5 (4)                 | 33.3 (4)          | 16.7 (2)           |
| <b>Level of education (n=67)</b>                   |                   |                          |                   |                    |
| No diploma                                         | 20.9 (14)         | 20.0 (8)                 | 16.7 (2)          | 26.7 (4)           |
| French Baccalaureate or equivalent                 | 16.4 (11)         | 20.0 (8)                 | 8.3 (1)           | 13.3 (2)           |
| Undergraduate (Bac +2)                             | 28.4 (19)         | 25.0 (10)                | 41.7 (5)          | 26.7 (4)           |
| Vocational education (CAP/BEP)                     | 20.9 (14)         | 20.0 (8)                 | 16.7 (2)          | 26.7 (4)           |
| Primary or elementary education                    | 13.4 (9)          | 15.0 (6)                 | 16.7 (2)          | 6.7 (1)            |
| <b>Monthly household income (n=67)</b>             |                   |                          |                   |                    |
| < 850 €                                            | 37.3 (25)         | 37.5 (15)                | 25.0 (3)          | 46.7 (7)           |

1  
2  
3  
4  
5  
6  
7  
8  
9  
10  
11  
12  
13  
14  
15  
16  
17  
18  
19  
20  
21  
22  
23  
24  
25  
26  
27  
28  
29  
30  
31  
32  
33  
34  
35  
36  
37  
38  
39  
40  
41  
42  
43  
44  
45  
46  
47  
48  
49  
50  
51  
52  
53  
54  
55  
56  
57  
58  
59  
60

|                 |           |           |          |          |
|-----------------|-----------|-----------|----------|----------|
| 850 € à 1100 €  | 9.1 (6)   | 10.0 (4)  | 16.7 (2) | 0 (0)    |
| 1100 € à 1800 € | 35.8 (24) | 30.0 (12) | 41.7 (5) | 46.7 (7) |
| 1800 € à 2500 € | 10.5 (7)  | 12.5 (5)  | 16.7 (2) | 0 (0)    |
| >2500 €         | 7.5 (5)   | 10.0 (4)  | 0 (0)    | 6.7 (1)  |

For peer review only

Supplementary table 2: Sociodemographic description of the women interviewed in the qualitative study (N=9)

|             | Age (years) | Employment | Duration of the violence (years) | Marital status         | Number of children |
|-------------|-------------|------------|----------------------------------|------------------------|--------------------|
| <b>MdF1</b> | 27          | Inactive   | 3                                | Unmarried cohabitation | 1                  |
| <b>MdF2</b> | 37          | Active     | 6                                | Single                 | 1                  |
| <b>MdF3</b> | 41          | Inactive   | 6                                | Single                 | 0                  |
| <b>MHC1</b> | 34          | Active     | 9                                | Single                 | 2                  |
| <b>MdF4</b> | 43          | Active     | unknown                          | Single                 | 3                  |
| <b>MdF5</b> | 48          | Inactive   | 13                               | Single                 | 1                  |
| <b>MdF6</b> | 34          | Active     | 3                                | Single                 | 0                  |
| <b>MHC2</b> | 55          | Inactive   | 2                                | Single                 | 1                  |
| <b>MHC3</b> | 30          | Active     | 1.5                              | Single                 | 1                  |

### Supplementary figure: Interview guide

Face-to-face interview to be conducted within the healthcare structure (the Maison des Femmes or the Municipal Health Center) with a woman who has declared that she is suffering/or has suffered intimate partner violence.

#### Part 1: open questions

Why did you come to the Maison des Femmes/Municipal Health Center?

What did the Maison des Femmes/Municipal Health Center do for you?

What do you know about supporting women who have suffered violence at the Maison des Femmes Municipal Health Centers?

In your opinion, which professionals does a woman who has suffered intimate partner violence need to meet?

Which professionals do you think could help her get out of a violent relationship?

How far do you think we should go in helping abused women?

In your opinion, what does the *Maison des Femmes/Municipal Health Center* lack in terms of support for abused women?

#### Part 2: socio-demographic data and characterization of violence

Age, marital status, geographical origin and number of years in France (if applicable), number of children, department of residence, duration of domestic violence, number of violent partners, types of violence, whether she is still in a relationship with the violent partner, religion/adherence to religion.

1  
2 Post-traumatic stress disorders in women victims-survivors of violence: a pilot study in a French coordinated structure  
3  
4  
5  
6

7 **STROBE 2007 (v4) Statement—Checklist of items that should be included in reports of *cohort studies***  
8

| Section/Topic                | Item # | Recommendation                                                                                                                                                                       | Reported on page # |
|------------------------------|--------|--------------------------------------------------------------------------------------------------------------------------------------------------------------------------------------|--------------------|
| Title and abstract           | 1      | (a) Indicate the study's design with a commonly used term in the title or the abstract                                                                                               | 1                  |
|                              |        | (b) Provide in the abstract an informative and balanced summary of what was done and what was found                                                                                  | 1                  |
| <b>Introduction</b>          |        |                                                                                                                                                                                      |                    |
| Background/rationale         | 2      | Explain the scientific background and rationale for the investigation being reported                                                                                                 | 4                  |
| Objectives                   | 3      | State specific objectives, including any prespecified hypotheses                                                                                                                     | 5                  |
| <b>Methods</b>               |        |                                                                                                                                                                                      |                    |
| Study design                 | 4      | Present key elements of study design early in the paper                                                                                                                              | 6                  |
| Setting                      | 5      | Describe the setting, locations, and relevant dates, including periods of recruitment, exposure, follow-up, and data collection                                                      | 6                  |
| Participants                 | 6      | (a) Give the eligibility criteria, and the sources and methods of selection of participants. Describe methods of follow-up                                                           | 6                  |
|                              |        | (b) For matched studies, give matching criteria and number of exposed and unexposed                                                                                                  | NA                 |
| Variables                    | 7      | Clearly define all outcomes, exposures, predictors, potential confounders, and effect modifiers. Give diagnostic criteria, if applicable                                             | 6-7                |
| Data sources/<br>measurement | 8*     | For each variable of interest, give sources of data and details of methods of assessment (measurement). Describe comparability of assessment methods if there is more than one group | 6                  |
| Bias                         | 9      | Describe any efforts to address potential sources of bias                                                                                                                            | 6                  |
| Study size                   | 10     | Explain how the study size was arrived at                                                                                                                                            | 6                  |
| Quantitative variables       | 11     | Explain how quantitative variables were handled in the analyses. If applicable, describe which groupings were chosen and why                                                         | 6                  |
| Statistical methods          | 12     | (a) Describe all statistical methods, including those used to control for confounding                                                                                                | 8                  |
|                              |        | (b) Describe any methods used to examine subgroups and interactions                                                                                                                  | 8                  |

|                          |     |                                                                                                                                                                                                              |       |
|--------------------------|-----|--------------------------------------------------------------------------------------------------------------------------------------------------------------------------------------------------------------|-------|
|                          |     | (c) Explain how missing data were addressed                                                                                                                                                                  | 6     |
|                          |     | (d) If applicable, explain how loss to follow-up was addressed                                                                                                                                               | NA    |
|                          |     | (e) Describe any sensitivity analyses                                                                                                                                                                        | NA    |
| <b>Results</b>           |     |                                                                                                                                                                                                              |       |
| Participants             | 13* | (a) Report numbers of individuals at each stage of study—eg numbers potentially eligible, examined for eligibility, confirmed eligible, included in the study, completing follow-up, and analysed            | 8     |
|                          |     | (b) Give reasons for non-participation at each stage                                                                                                                                                         | 8     |
|                          |     | (c) Consider use of a flow diagram                                                                                                                                                                           | NA    |
| Descriptive data         | 14* | (a) Give characteristics of study participants (eg demographic, clinical, social) and information on exposures and potential confounders                                                                     | 9     |
|                          |     | (b) Indicate number of participants with missing data for each variable of interest                                                                                                                          | NA    |
|                          |     | (c) Summarise follow-up time (eg, average and total amount)                                                                                                                                                  | 6     |
| Outcome data             | 15* | Report numbers of outcome events or summary measures over time                                                                                                                                               | 9     |
| Main results             | 16  | (a) Give unadjusted estimates and, if applicable, confounder-adjusted estimates and their precision (eg, 95% confidence interval). Make clear which confounders were adjusted for and why they were included | 9     |
|                          |     | (b) Report category boundaries when continuous variables were categorized                                                                                                                                    | 9     |
|                          |     | (c) If relevant, consider translating estimates of relative risk into absolute risk for a meaningful time period                                                                                             | NA    |
| Other analyses           | 17  | Report other analyses done—eg analyses of subgroups and interactions, and sensitivity analyses                                                                                                               | NA    |
| <b>Discussion</b>        |     |                                                                                                                                                                                                              |       |
| Key results              | 18  | Summarise key results with reference to study objectives                                                                                                                                                     | 11    |
| <b>Limitations</b>       |     |                                                                                                                                                                                                              |       |
| Interpretation           | 20  | Give a cautious overall interpretation of results considering objectives, limitations, multiplicity of analyses, results from similar studies, and other relevant evidence                                   | 11-12 |
| Generalisability         | 21  | Discuss the generalisability (external validity) of the study results                                                                                                                                        | 12-13 |
| <b>Other information</b> |     |                                                                                                                                                                                                              |       |
| Funding                  | 22  | Give the source of funding and the role of the funders for the present study and, if applicable, for the original study on which the present article is based                                                | 2     |

\*Give information separately for cases and controls in case-control studies and, if applicable, for exposed and unexposed groups in cohort and cross-sectional studies.

1  
2  
3  
4  
5  
6  
7  
8  
9  
10  
11  
12  
13  
14  
15  
16  
17  
18  
19  
20  
21  
22  
23  
24  
25  
26  
27  
28  
29  
30  
31  
32  
33  
34  
35  
36  
37  
38  
39  
40  
41  
42  
43  
44  
45  
46

**Note:** An Explanation and Elaboration article discusses each checklist item and gives methodological background and published examples of transparent reporting. The STROBE checklist is best used in conjunction with this article (freely available on the Web sites of PLoS Medicine at <http://www.plosmedicine.org/>, Annals of Internal Medicine at <http://www.annals.org/>, and Epidemiology at <http://www.epidem.com/>). Information on the STROBE Initiative is available at [www.strobe-statement.org](http://www.strobe-statement.org).

For peer review only
