# Supplementary material for: Post-traumatic stress disorders in women victims-survivors of intimate partner violence: a mixed-methods pilot study in a French coordinated structure
Source: PubMed Central journal article supplement — BMJ Open. 2024 Jan 23;14(1):e075552. doi: 10.1136/bmjopen-2023-075552 (PMC10824011; doi:10.1136/bmjopen-2023-075552), 2024-01-23
Supplement: bmjopen-2023-075552supp001.pdf [file bmjopen-2023-075552supp001.pdf]

**Supplementary figure: Interview guide**

Face-to-face interview to be conducted within the healthcare structure (the Maison des Femmes or the Municipal Health Center) with a woman who has declared that she is suffering/or has suffered intimate partner violence.

**Part 1: open questions**

Why did you come to the Maison des Femmes/Municipal Health Center?

What did the Maison des Femmes/Municipal Health Center do for you?

What do you know about supporting women who have suffered violence at the Maison des Femmes Municipal Health Centers?

In your opinion, which professionals does a woman who has suffered intimate partner violence need to meet?

Which professionals do you think could help her get out of a violent relationship?

How far do you think we should go in helping abused women?

In your opinion, what does the *Maison des Femmes/Municipal Health Center* lack in terms of support for abused women?

**Part 2: socio-demographic data and characterization of violence**

Age, marital status, geographical origin and number of years in France (if applicable), number of children, department of residence, duration of domestic violence, number of violent partners, types of violence, whether she is still in a relationship with the violent partner, religion/adherence to religion.
