# Supplementary material for: Post-traumatic stress disorders in women victims-survivors of intimate partner violence: a mixed-methods pilot study in a French coordinated structure
Source: PubMed Central journal article supplement — BMJ Open. 2024 Jan 23;14(1):e075552. doi: 10.1136/bmjopen-2023-075552 (PMC10824011; doi:10.1136/bmjopen-2023-075552), 2024-01-23
Supplement: bmjopen-2023-075552supp002.pdf [file bmjopen-2023-075552supp002.pdf]

Supplementary Table 1: Detailed sociodemographic characteristics of study participants (n=67)

|                                                    | ALL<br>N=67<br>% (n) | Maison des Femmes<br>N=40<br>% (n) | MHC-1<br>N=12<br>% (n) | MHC-2<br>N=15<br>% (n) |
|----------------------------------------------------|----------------------|------------------------------------|------------------------|------------------------|
| <b>Age (years) (n=67)</b>                          |                      |                                    |                        |                        |
| Mean [SD, range]                                   | 34.1 [9.7, 18-71]    | 31.3 [8.2, 18-71]                  | 40.3 [8.7, 29-55]      | 36.5 [10.0, 21-52]     |
| Median                                             | 33                   | 29                                 | 37                     | 37                     |
| <b>In a couple for (n=32)</b>                      |                      |                                    |                        |                        |
| Less than a year                                   | 25.0 (8)             | 10.0 (4)                           | 20.0 (1)               | 42.8 (3)               |
| 1-5 years                                          | 37.5 (12)            | 20.0 (8)                           | 40.0 (2)               | 28.6 (2)               |
| 6-15 years                                         | 28.1 (9)             | 15.0 (6)                           | 40.0 (2)               | 14.3 (1)               |
| >15 years                                          | 9.4 (3)              | 5.0 (2)                            | 0 (0)                  | 14.3 (1)               |
| <b>Housing situation (n=66)</b>                    |                      |                                    |                        |                        |
| Lives alone (tenant or owner of the house)         | 51.5 (34)            | 51.3 (20)                          | 58.3 (7)               | 46.7 (7)               |
| Lives with (ex)spouse (tenant or owner)            | 13.6 (9)             | 18.0 (7)                           | 0 (0)                  | 13.3 (2)               |
| (Ex)spouse alone (tenant or owner of the dwelling) | 1.5 (1)              | 0 (0)                              | 0 (0)                  | 6.7 (1)                |
| Staying with family/friends                        | 24.2 (16)            | 20.5 (8)                           | 33.3 (4)               | 26.7 (4)               |
| Staying in a hostel                                | 9.1 (6)              | 10.3 (4)                           | 8.3 (1)                | 6.7 (1)                |
| <b>Geographic origin (n=62)</b>                    |                      |                                    |                        |                        |
| North Africa                                       | 24.2 (15)            | 21.1 (8)                           | 25.0 (3)               | 33.3 (4)               |
| Sub-Saharan Africa                                 | 43.5 (27)            | 52.6 (20)                          | 33.3 (4)               | 25.0 (3)               |
| Caribbean/Americas                                 | 8.1 (5)              | 10.5 (4)                           | 8.3 (1)                | 0 (0)                  |
| Asia/Middle East                                   | 3.2 (2)              | 0 (0)                              | (0)                    | 16.7 (2)               |
| Europe outside France                              | 4.8 (3)              | 5.3 (2)                            | (0)                    | 8.3 (1)                |
| France                                             | 16.1 (10)            | 10.5 (4)                           | 33.3 (4)               | 16.7 (2)               |
| <b>Level of education (n=67)</b>                   |                      |                                    |                        |                        |
| No diploma                                         | 20.9 (14)            | 20.0 (8)                           | 16.7 (2)               | 26.7 (4)               |
| French Baccalaureate or equivalent                 | 16.4 (11)            | 20.0 (8)                           | 8.3 (1)                | 13.3 (2)               |
| Undergraduate (Bac +2)                             | 28.4 (19)            | 25.0 (10)                          | 41.7 (5)               | 26.7 (4)               |
| Vocational education (CAP/BEP)                     | 20.9 (14)            | 20.0 (8)                           | 16.7 (2)               | 26.7 (4)               |
| Primary or elementary education                    | 13.4 (9)             | 15.0 (6)                           | 16.7 (2)               | 6.7 (1)                |
| <b>Monthly household income (n=67)</b>             |                      |                                    |                        |                        |
| < 850 €                                            | 37.3 (25)            | 37.5 (15)                          | 25.0 (3)               | 46.7 (7)               |

---

|                 |           |           |          |          |
|-----------------|-----------|-----------|----------|----------|
| 850 € à 1100 €  | 9.1 (6)   | 10.0 (4)  | 16.7 (2) | 0 (0)    |
| 1100 € à 1800 € | 35.8 (24) | 30.0 (12) | 41.7 (5) | 46.7 (7) |
| 1800 € à 2500 € | 10.5 (7)  | 12.5 (5)  | 16.7 (2) | 0 (0)    |
| >2500 €         | 7.5 (5)   | 10.0 (4)  | 0 (0)    | 6.7 (1)  |

Supplementary table 2: Sociodemographic description of the women interviewed in the qualitative study (N=9)

|             | <b>Age<br/>(years)</b> | <b>Employment</b> | <b>Duration of the violence<br/>(years)</b> | <b>Marital status</b>  | <b>Number of<br/>children</b> |
|-------------|------------------------|-------------------|---------------------------------------------|------------------------|-------------------------------|
| <b>MdF1</b> | 27                     | Inactive          | 3                                           | Unmarried cohabitation | 1                             |
| <b>MdF2</b> | 37                     | Active            | 6                                           | Single                 | 1                             |
| <b>MdF3</b> | 41                     | Inactive          | 6                                           | Single                 | 0                             |
| <b>MHC1</b> | 34                     | Active            | 9                                           | Single                 | 2                             |
| <b>MdF4</b> | 43                     | Active            | unknown                                     | Single                 | 3                             |
| <b>MdF5</b> | 48                     | Inactive          | 13                                          | Single                 | 1                             |
| <b>MdF6</b> | 34                     | Active            | 3                                           | Single                 | 0                             |
| <b>MHC2</b> | 55                     | Inactive          | 2                                           | Single                 | 1                             |
| <b>MHC3</b> | 30                     | Active            | 1.5                                         | Single                 | 1                             |
